# Supplementary material for: Phytochemicals with Chemopreventive Activity Obtained from the Thai Medicinal Plant Mammea siamensis (Miq.) T. Anders.: Isolation and Structure Determination of New Prenylcoumarins with Inhibitory Activity against Aromatase
Source: MDPI journal article supplement (doi:10.3390/ijms231911233), 2022-09-23
Supplement: s1 [file s1]

## Supplementary Materials:

# Phytochemicals with Chemopreventive Activity Obtained from the Thai Medicinal Plant *Mammea siamensis* (Miq.) T. Anders.: Isolation and Structure Determination of New Prenylcoumarins Inhibitory Activity against Aromatase

Fenglin Luo <sup>1</sup>, Yoshiaki Manse <sup>1</sup>, Saowanee Chaipech <sup>1,2</sup>, Yutana Pongpiriyadacha <sup>3</sup>, Osamu Muraoka <sup>1</sup>, and Toshio Morikawa <sup>1,\*</sup>

<sup>1</sup> Pharmaceutical Research and Technology Institute, Kindai University, 3-4-1 Kowakae, Higashi-osaka 577-8502, Osaka, Japan

<sup>2</sup> Faculty of Agro-Industry, Rajamangala University of Technology Srivijaya, Thungyai, Nakhon Si Thammarat, 80240, Thailand

<sup>3</sup> Faculty of Science and Technology, Rajamangala University of Technology Srivijaya, Thungyai, Nakhon Si Thammarat, 80240, Thailand

\* Correspondence: morikawa@kindai.ac.jp; Tel. +81-6-4307-4306; Fax: +81-6-6729-3577

### Table of Contents

|                                                                                                                                                                                                                               |     |
|-------------------------------------------------------------------------------------------------------------------------------------------------------------------------------------------------------------------------------|-----|
| <b>Figure S1.</b> <sup>1</sup> H-NMR (800 MHz, CDCl <sub>3</sub> ) spectrum of mammeasin K (1) .....                                                                                                                          | S2  |
| <b>Figure S2.</b> <sup>13</sup> C-NMR (200 MHz, CDCl <sub>3</sub> ) spectrum of mammeasin K (1) .....                                                                                                                         | S3  |
| <b>Figure S3.</b> <sup>1</sup> H- <sup>1</sup> H COSY spectrum of mammeasin K (1) .....                                                                                                                                       | S4  |
| <b>Figure S4.</b> HSQC spectrum of mammeasin K (1) .....                                                                                                                                                                      | S5  |
| <b>Figure S5.</b> HMBC spectrum of mammeasin K (1) .....                                                                                                                                                                      | S6  |
| <b>Figure S6.</b> <sup>1</sup> H-NMR (800 MHz, CDCl <sub>3</sub> ) spectrum of mammeasin L (2) .....                                                                                                                          | S7  |
| <b>Figure S7.</b> <sup>13</sup> C-NMR (200 MHz, CDCl <sub>3</sub> ) spectrum of mammeasin L (2) .....                                                                                                                         | S8  |
| <b>Figure S8.</b> <sup>1</sup> H- <sup>1</sup> H COSY spectrum of mammeasin L (2) .....                                                                                                                                       | S9  |
| <b>Figure S9.</b> HSQC spectrum of mammeasin L (2) .....                                                                                                                                                                      | S10 |
| <b>Figure S10.</b> HMBC spectrum of mammeasin L (2) .....                                                                                                                                                                     | S11 |
| <b>Figure S11.</b> <sup>1</sup> H-NMR (500 MHz, CDCl <sub>3</sub> ) spectrum of mammeasin M (3) .....                                                                                                                         | S12 |
| <b>Figure S12.</b> <sup>13</sup> C-NMR (125 MHz, CDCl <sub>3</sub> ) spectrum of mammeasin M (3) .....                                                                                                                        | S13 |
| <b>Figure S13.</b> <sup>1</sup> H- <sup>1</sup> H COSY spectrum of mammeasin M (3) .....                                                                                                                                      | S14 |
| <b>Figure S14.</b> HSQC spectrum of mammeasin M (3) .....                                                                                                                                                                     | S15 |
| <b>Figure S15.</b> HMBC spectrum of mammeasin M (3) .....                                                                                                                                                                     | S16 |
| <b>Figure S16.</b> Difference NOE spectrum of mammeasin M (3) .....                                                                                                                                                           | S17 |
| <b>Figure S17.</b> <sup>1</sup> H-NMR (800 MHz, CDCl <sub>3</sub> ) spectrum of mammeasin N (4) .....                                                                                                                         | S18 |
| <b>Figure S18.</b> <sup>13</sup> C-NMR (200 MHz, CDCl <sub>3</sub> ) spectrum of mammeasin N (4) .....                                                                                                                        | S19 |
| <b>Figure S19.</b> <sup>1</sup> H- <sup>1</sup> H COSY spectrum of mammeasin N (4) .....                                                                                                                                      | S20 |
| <b>Figure S20.</b> HSQC spectrum of mammeasin N (4) .....                                                                                                                                                                     | S21 |
| <b>Figure S21.</b> HMBC spectrum of mammeasin N (4) .....                                                                                                                                                                     | S22 |
| <b>Figure S22.</b> <sup>1</sup> H-NMR (500 MHz, CDCl <sub>3</sub> ) spectrum of mammeasin O (5) .....                                                                                                                         | S23 |
| <b>Figure S23.</b> <sup>13</sup> C-NMR (125 MHz, CDCl <sub>3</sub> ) spectrum of mammeasin O (5) .....                                                                                                                        | S24 |
| <b>Figure S24.</b> <sup>1</sup> H- <sup>1</sup> H COSY spectrum of mammeasin O (5) .....                                                                                                                                      | S25 |
| <b>Figure S25.</b> HSQC spectrum of mammeasin O (5) .....                                                                                                                                                                     | S26 |
| <b>Figure S26.</b> HMBC spectrum of mammeasin O (5) .....                                                                                                                                                                     | S27 |
| <b>Figure S27.</b> Lineweaver-Burk plots of the inhibition of human recombinant aromatase activity by <b>1</b> , <b>4–11</b> , <b>16</b> , <b>17</b> , <b>23–25</b> , <b>28</b> , <b>33</b> , <b>38</b> , and <b>39</b> ..... | S28 |

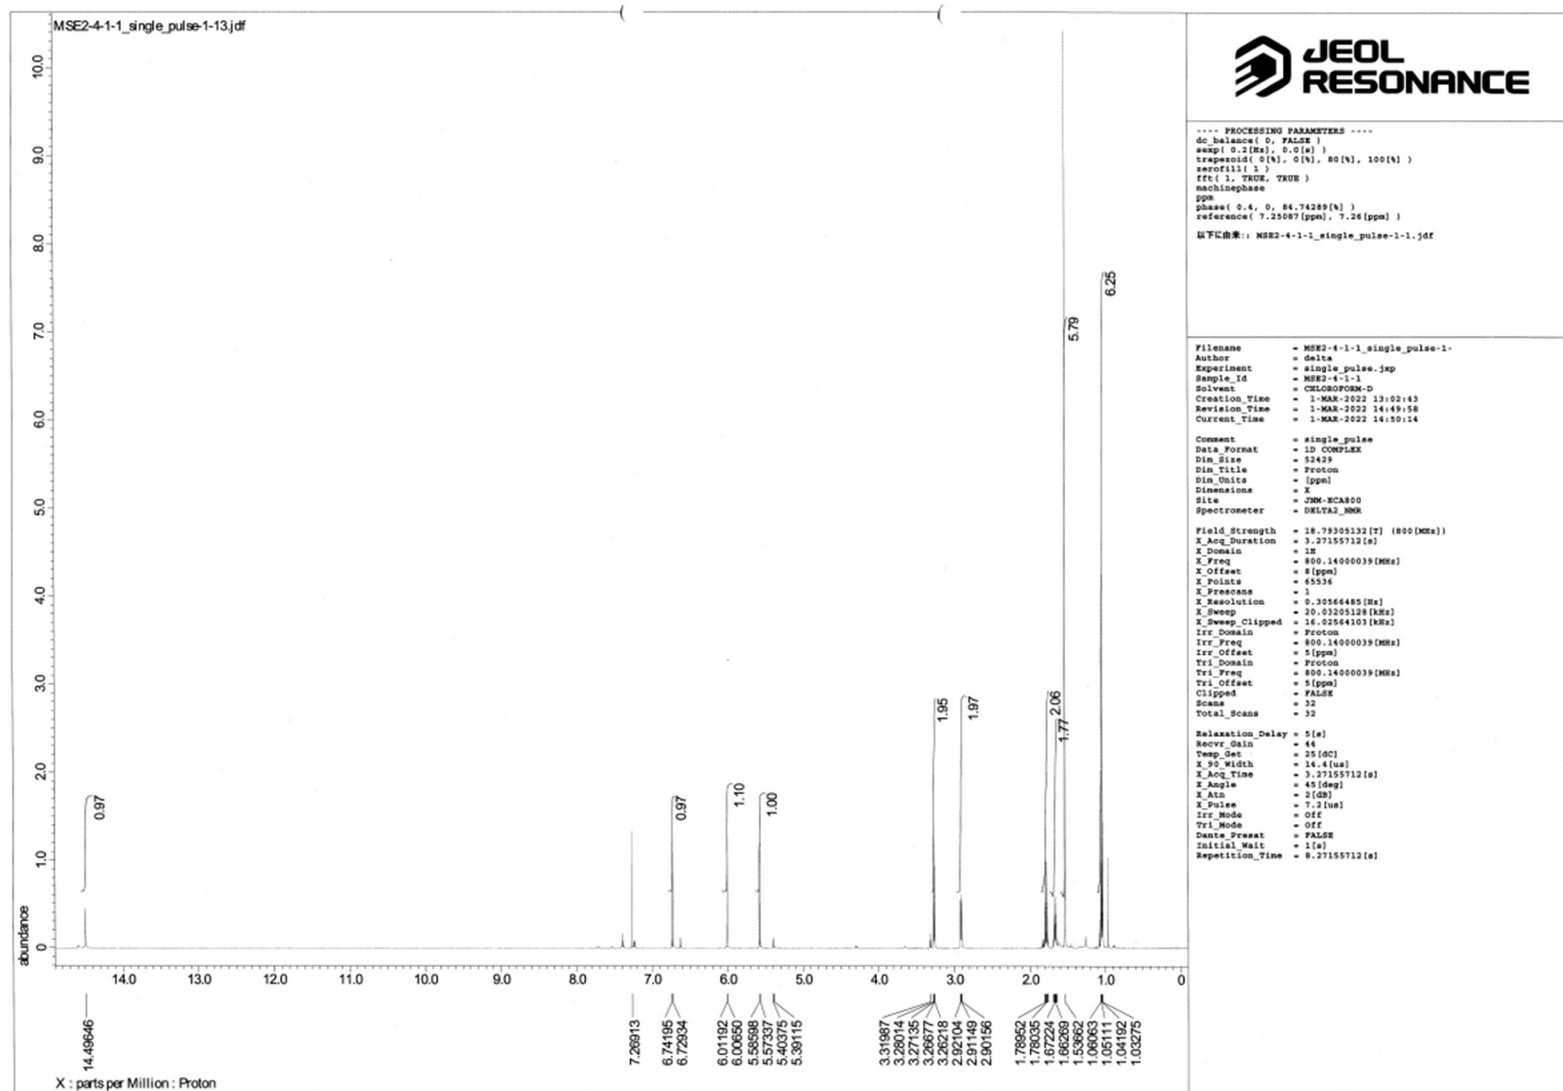Figure S1.  $^1\text{H}$ -NMR (800 MHz,  $\text{CDCl}_3$ ) spectrum of mammeasin K (1)

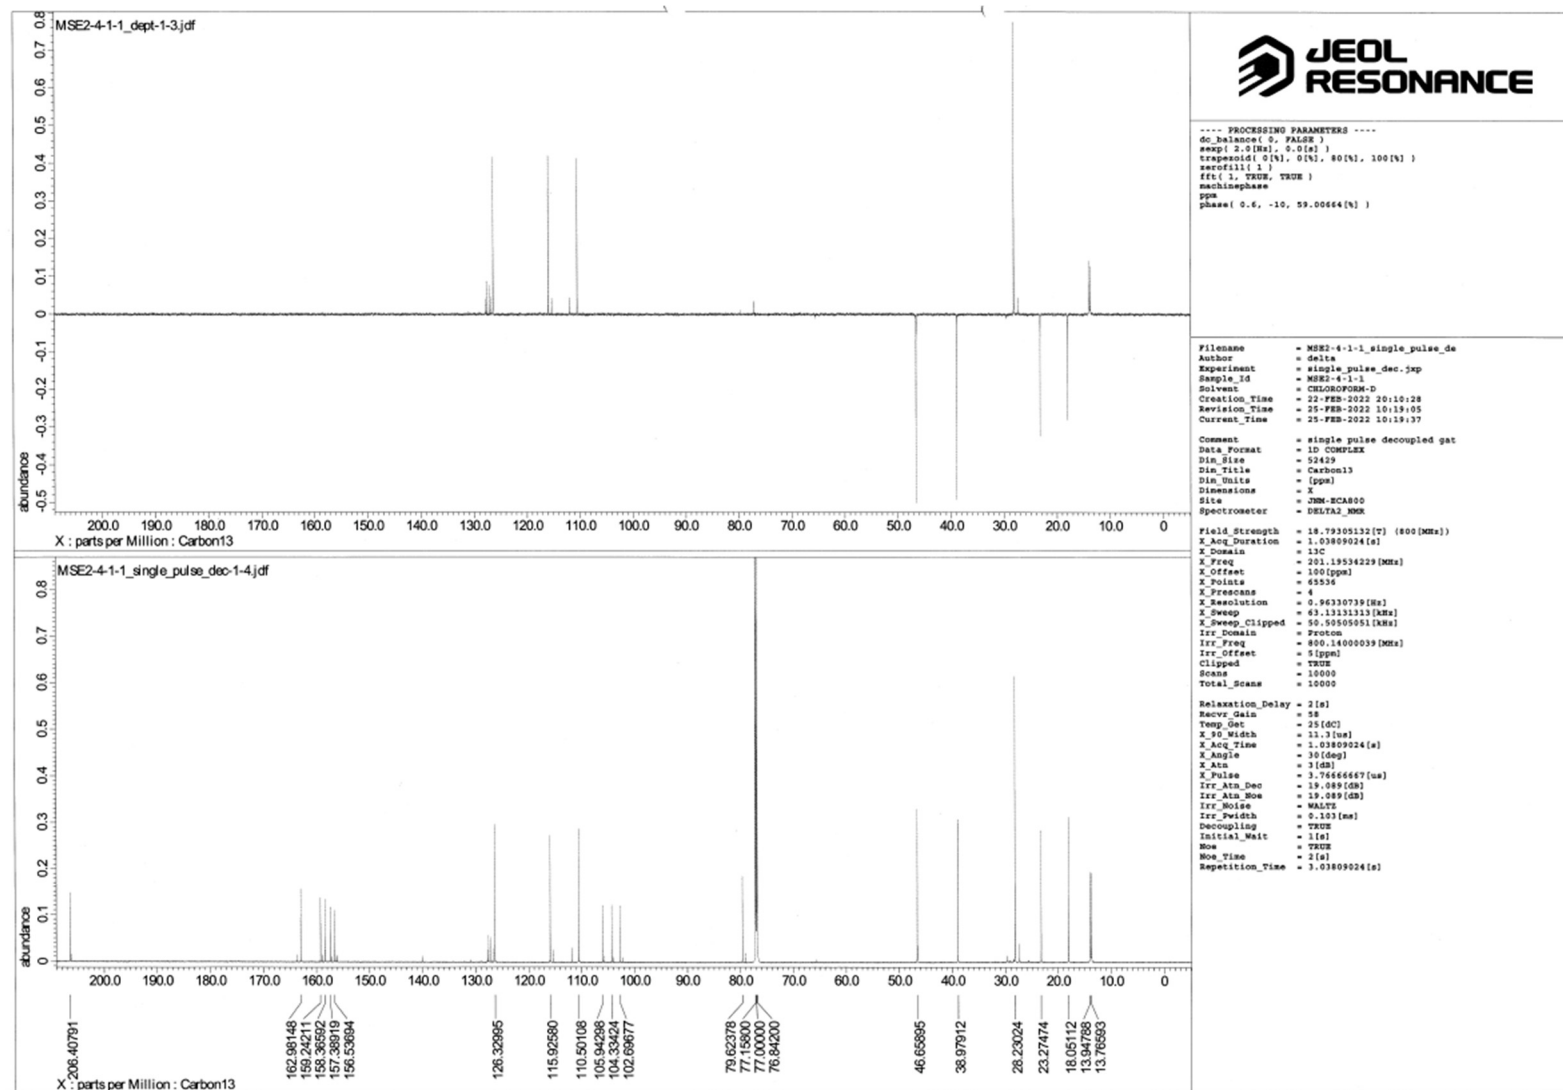Figure S2.  $^{13}\text{C}$ -NMR (200 MHz,  $\text{CDCl}_3$ ) spectrum of mammeasin K (1)

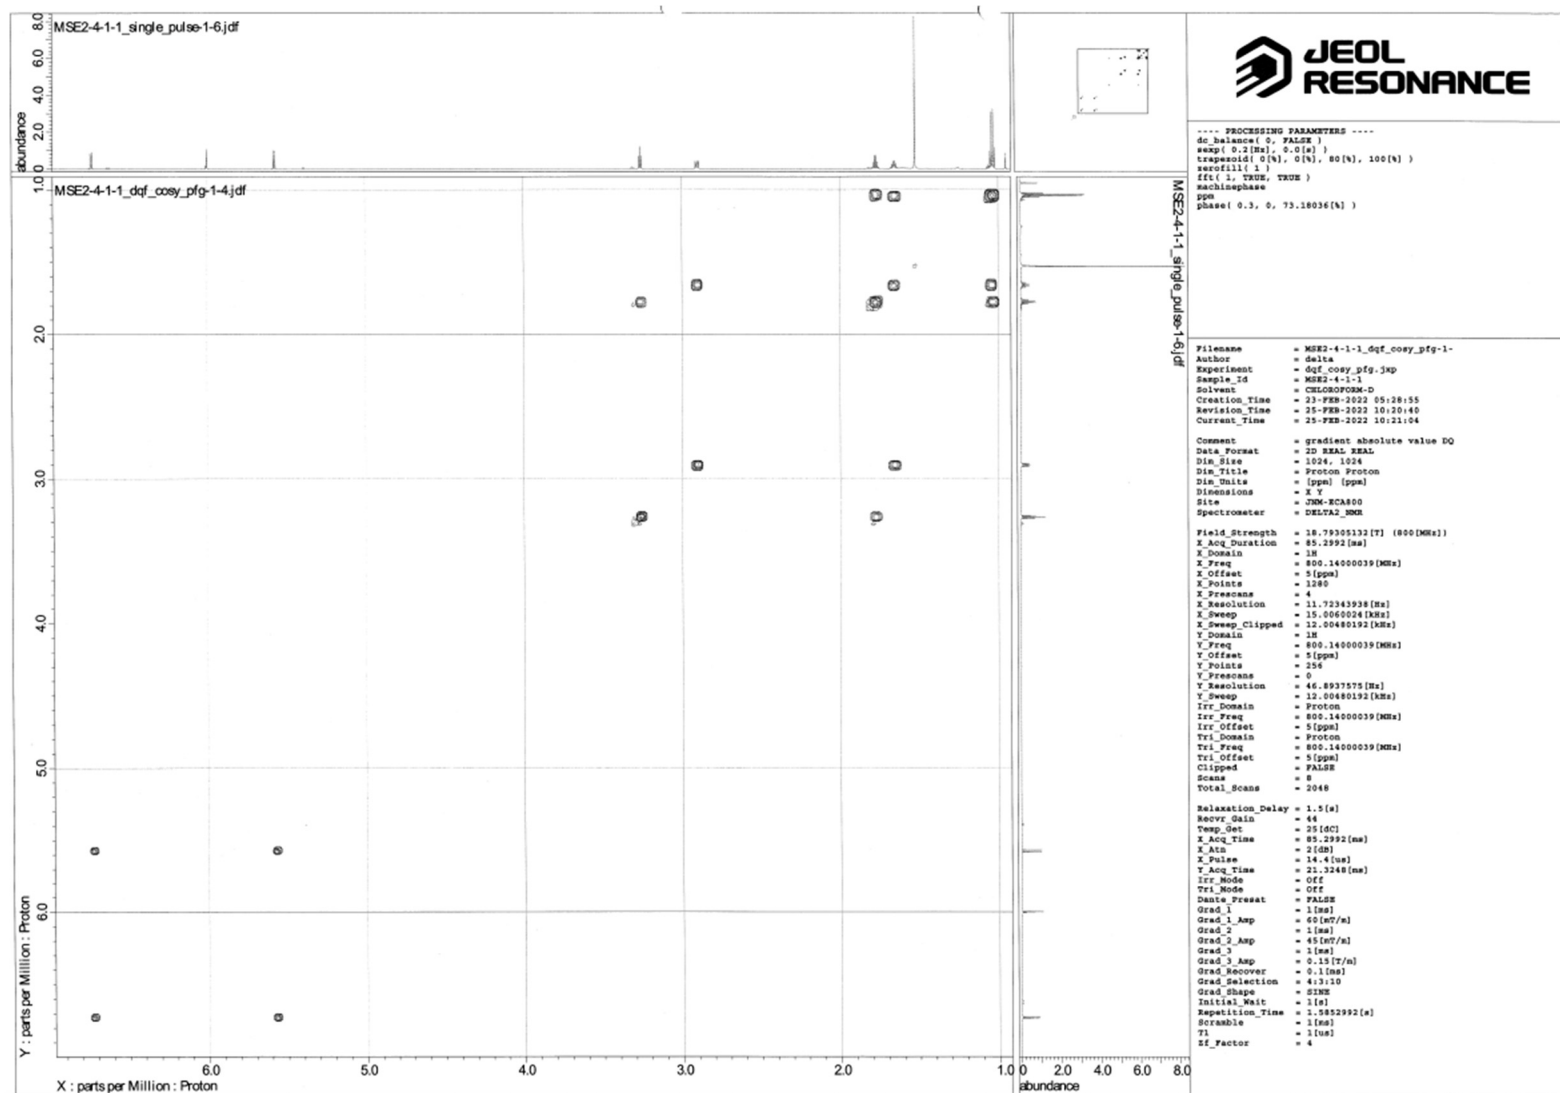Figure S3.  $^1\text{H}$ - $^1\text{H}$  COSY spectrum of mammeasin K (1)



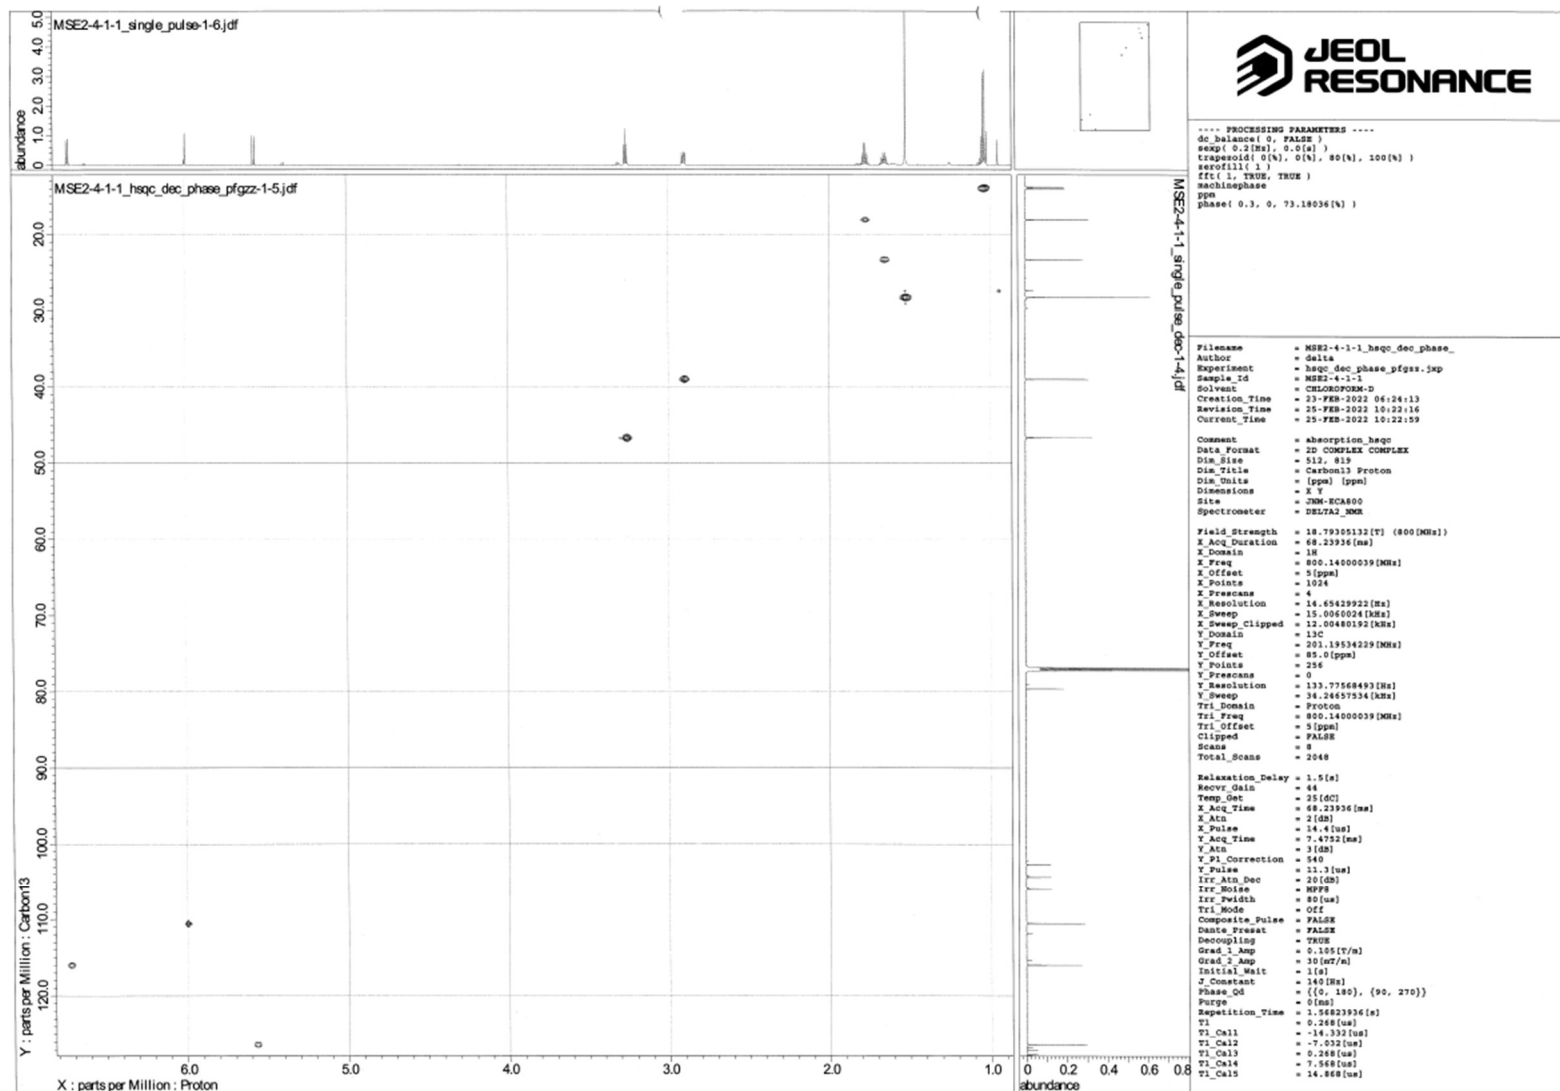

Figure S4. HSQC spectrum of mammeasin K (1)

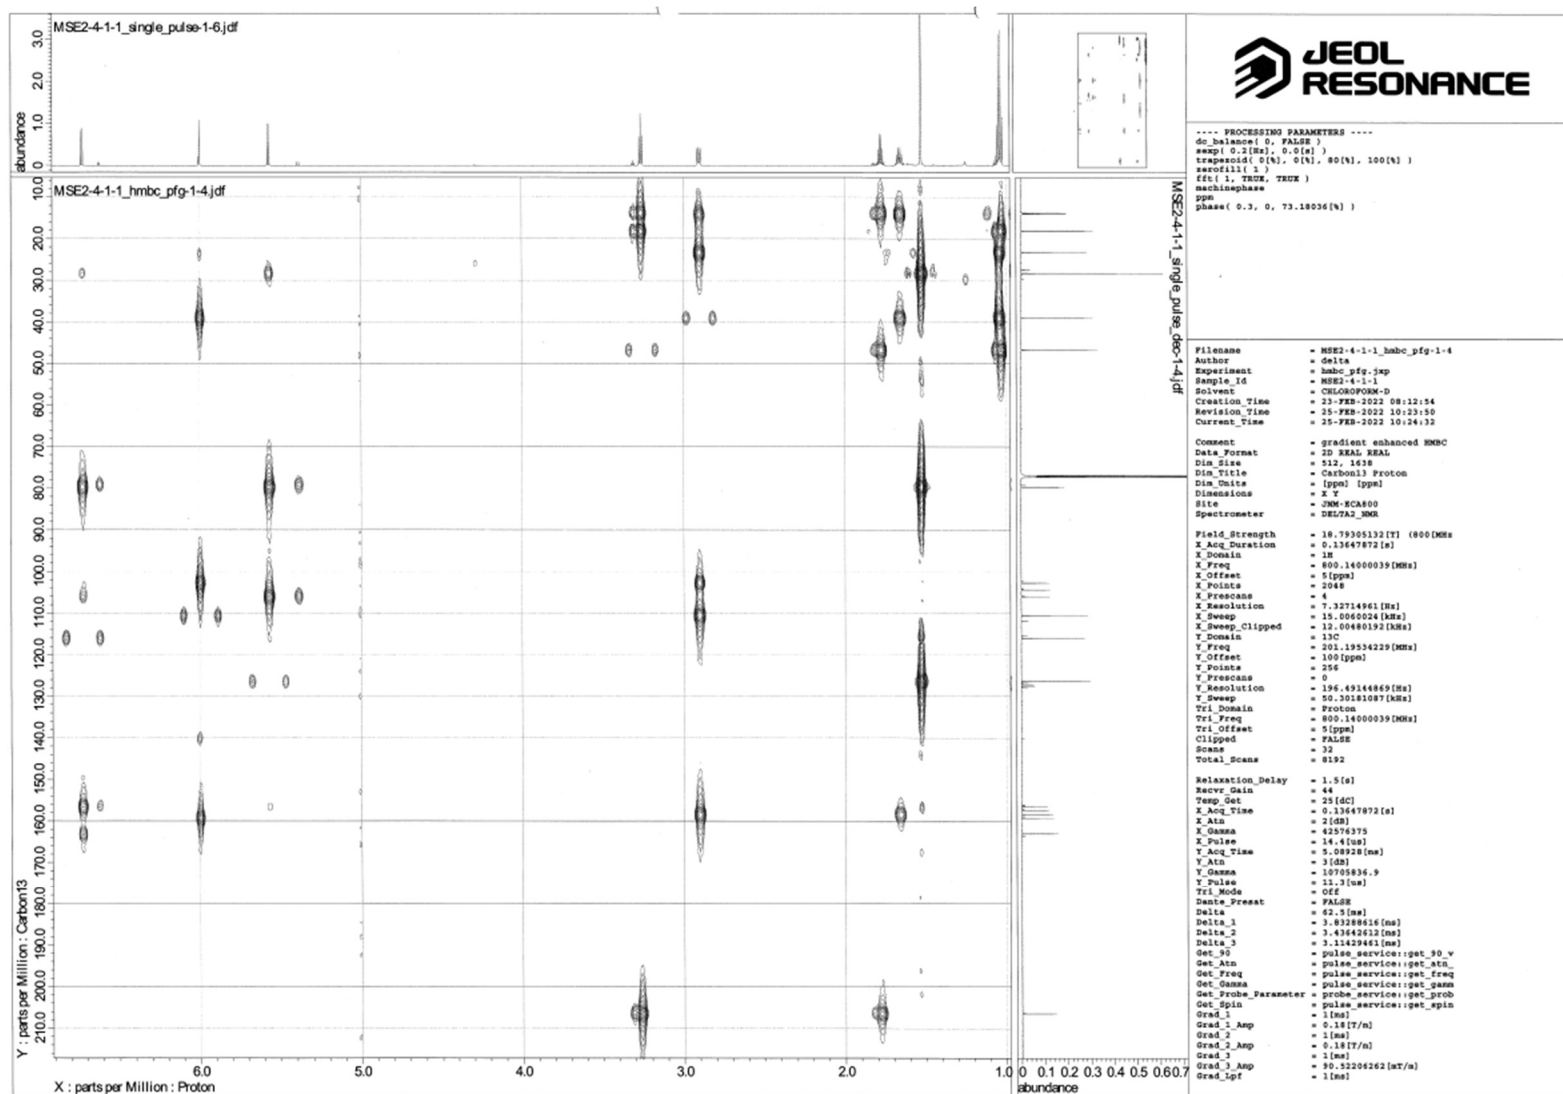

Figure S5. HMBC spectrum of mammeasin K (1)

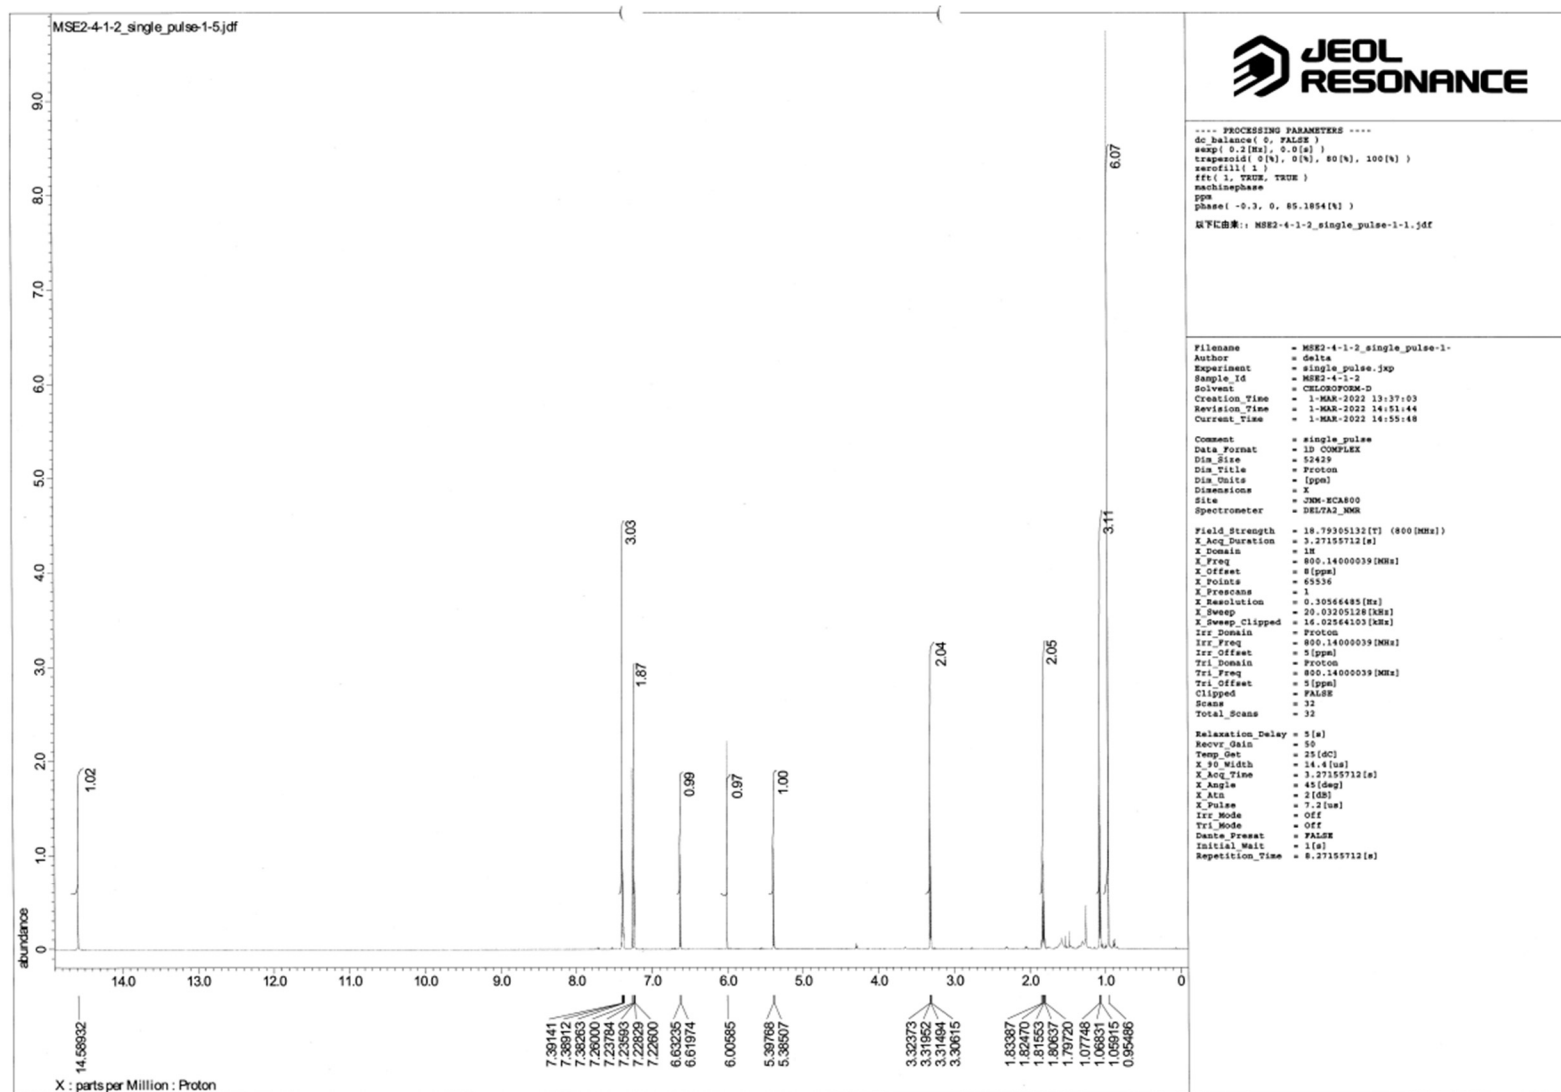Figure S6.  $^1\text{H}$ -NMR (800 MHz,  $\text{CDCl}_3$ ) spectrum of mammeasin L (2)

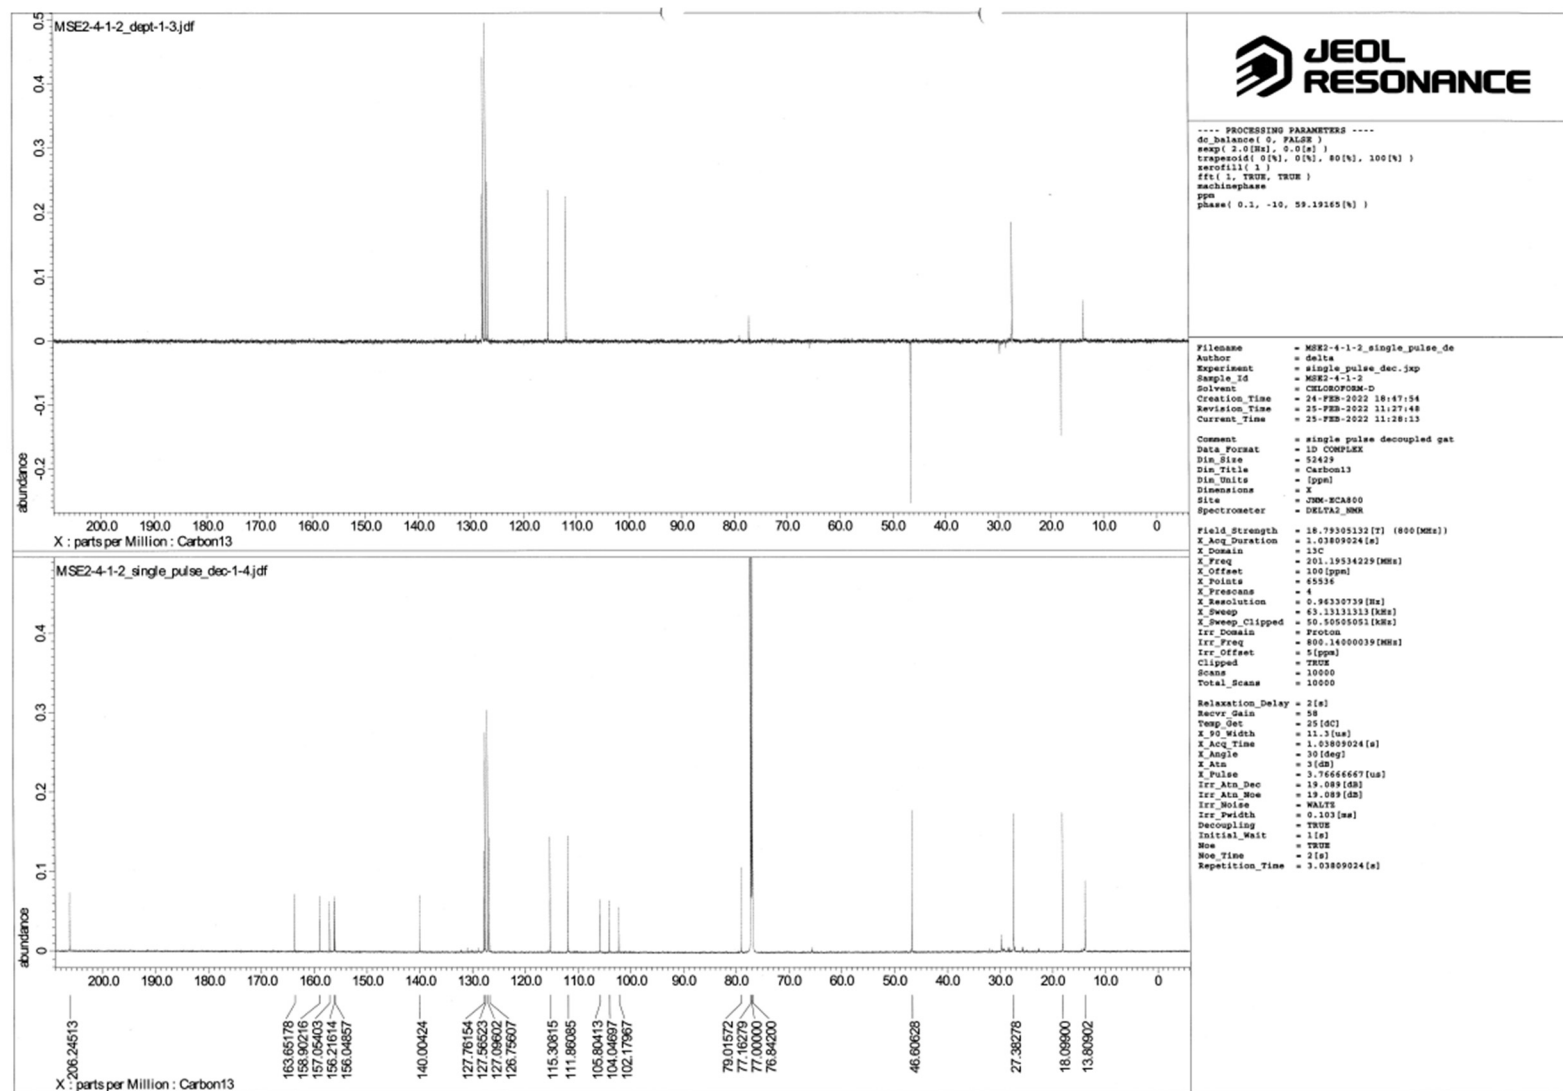Figure S7.  $^{13}\text{C}$ -NMR (200 MHz,  $\text{CDCl}_3$ ) spectrum of mammeasin L (2)

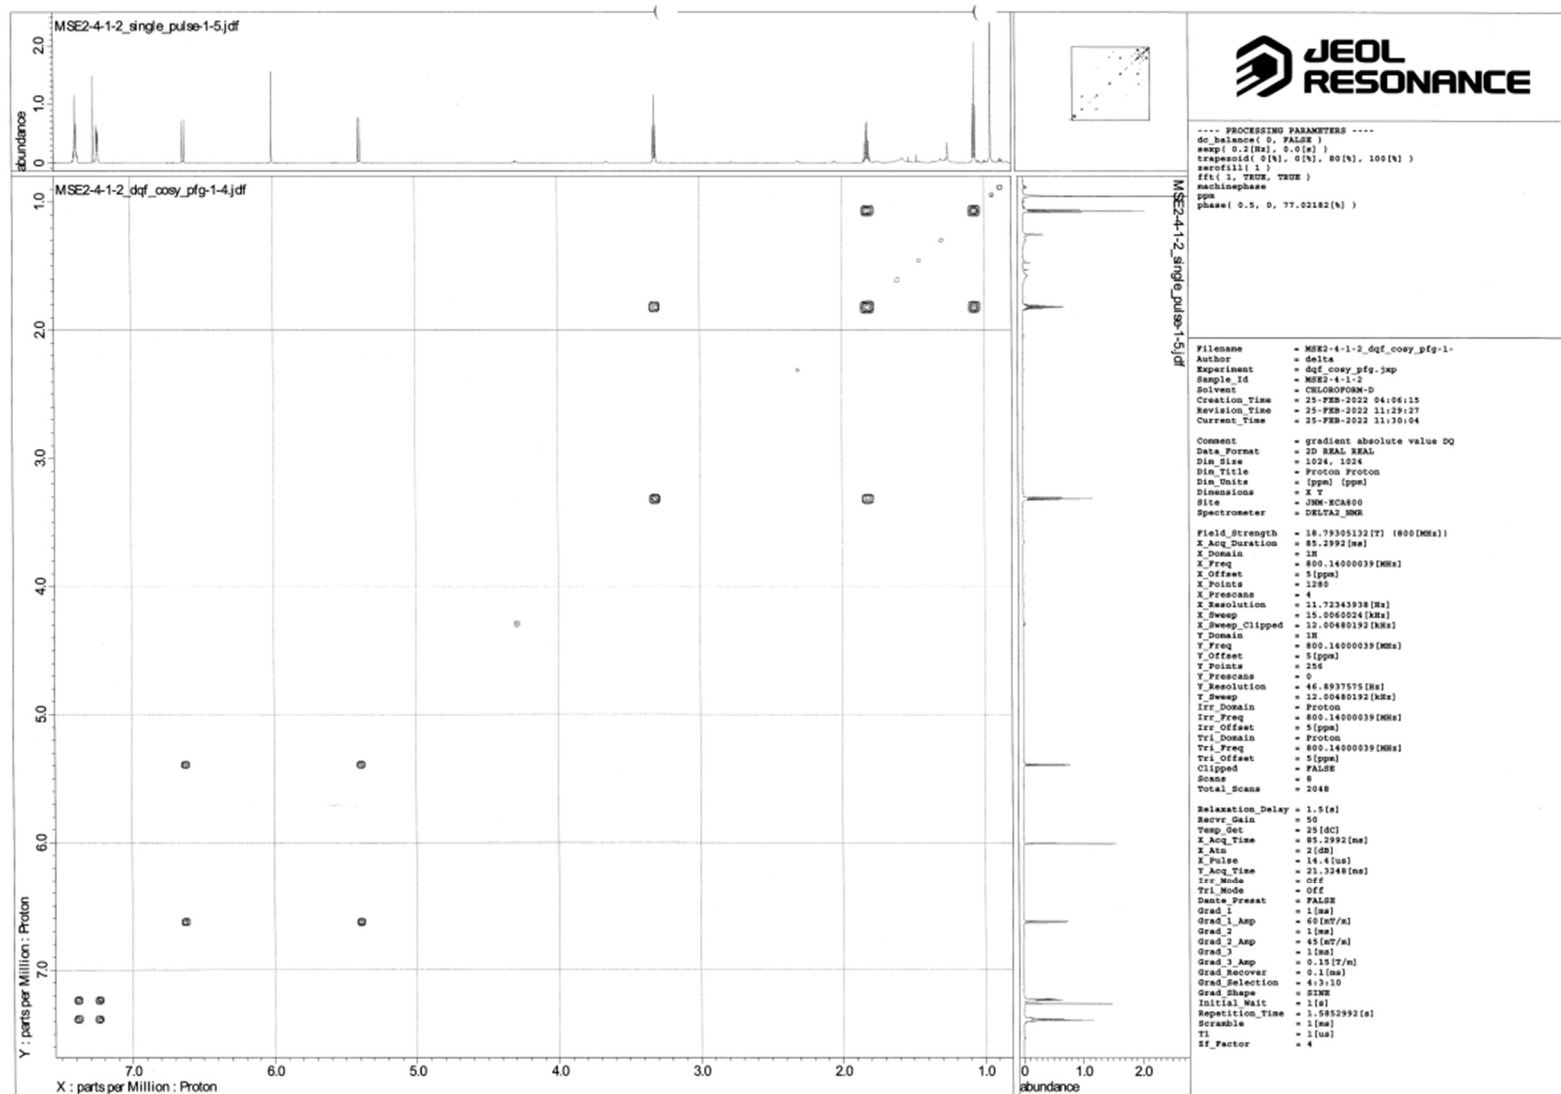Figure S8.  $^1\text{H}$ - $^1\text{H}$  COSY spectrum of mammeasin L (2)

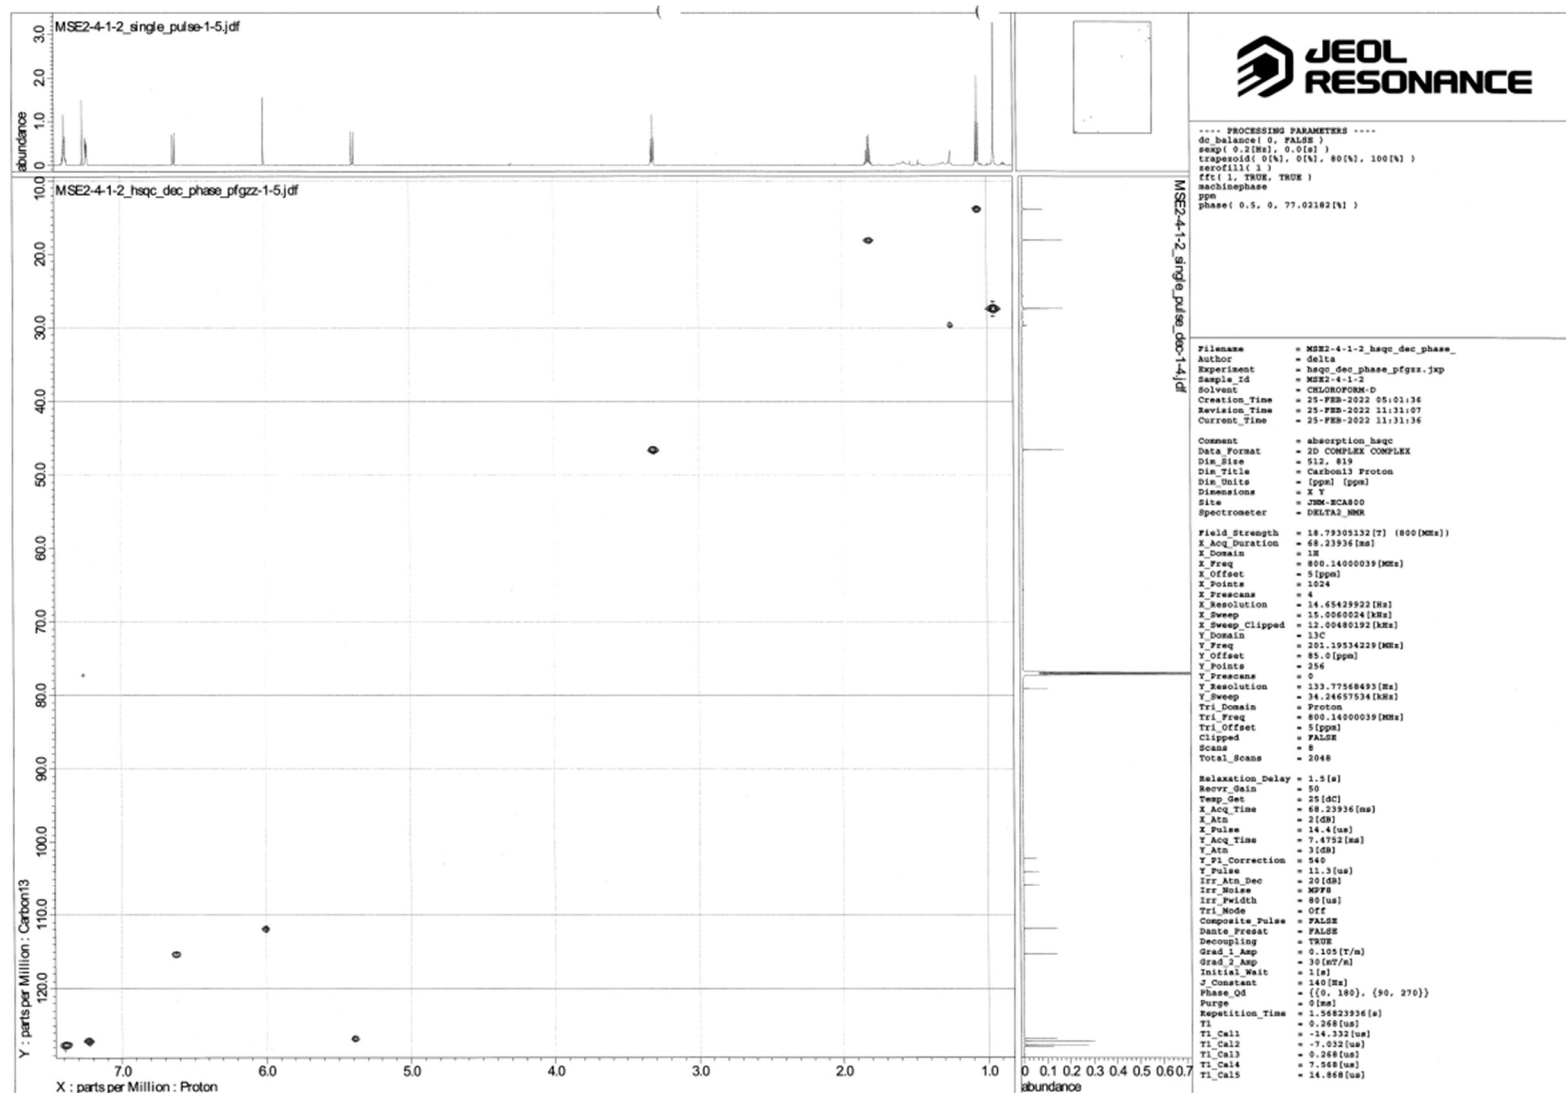

Figure S9. HSQC spectrum of mammeasin L (2)

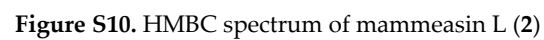



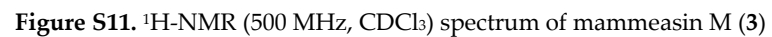



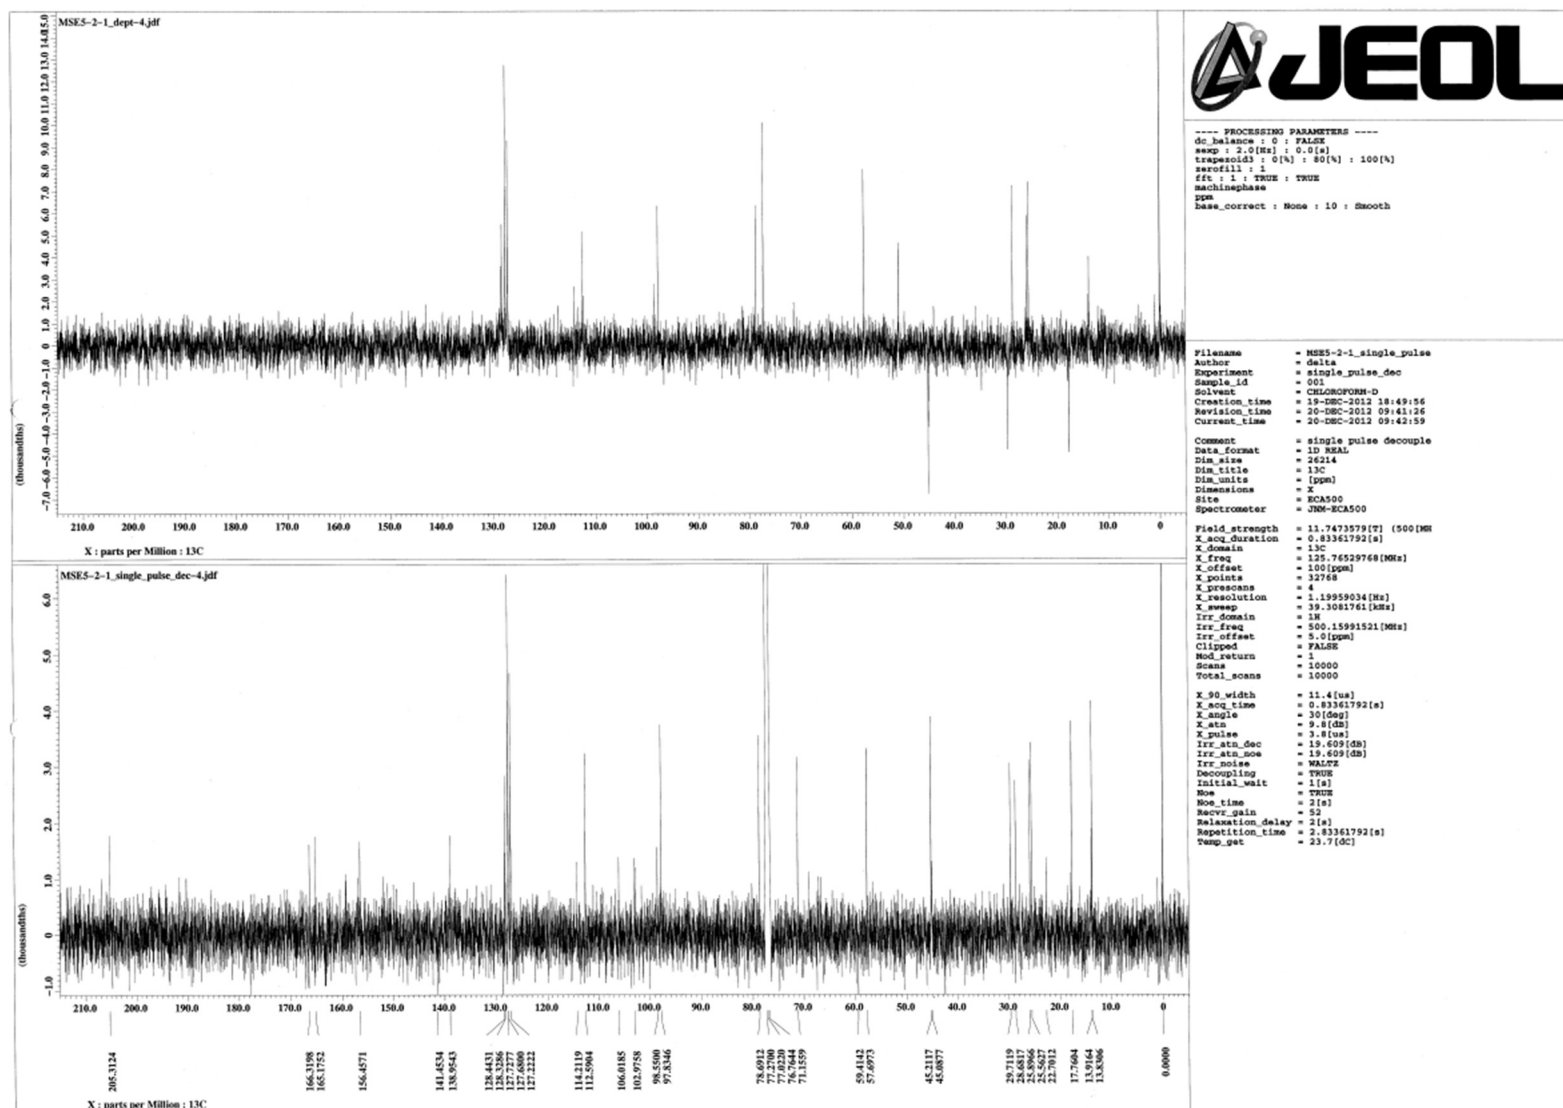Figure S12.  $^{13}\text{C}$ -NMR (125 MHz,  $\text{CDCl}_3$ ) spectrum of mammeasin M (3)

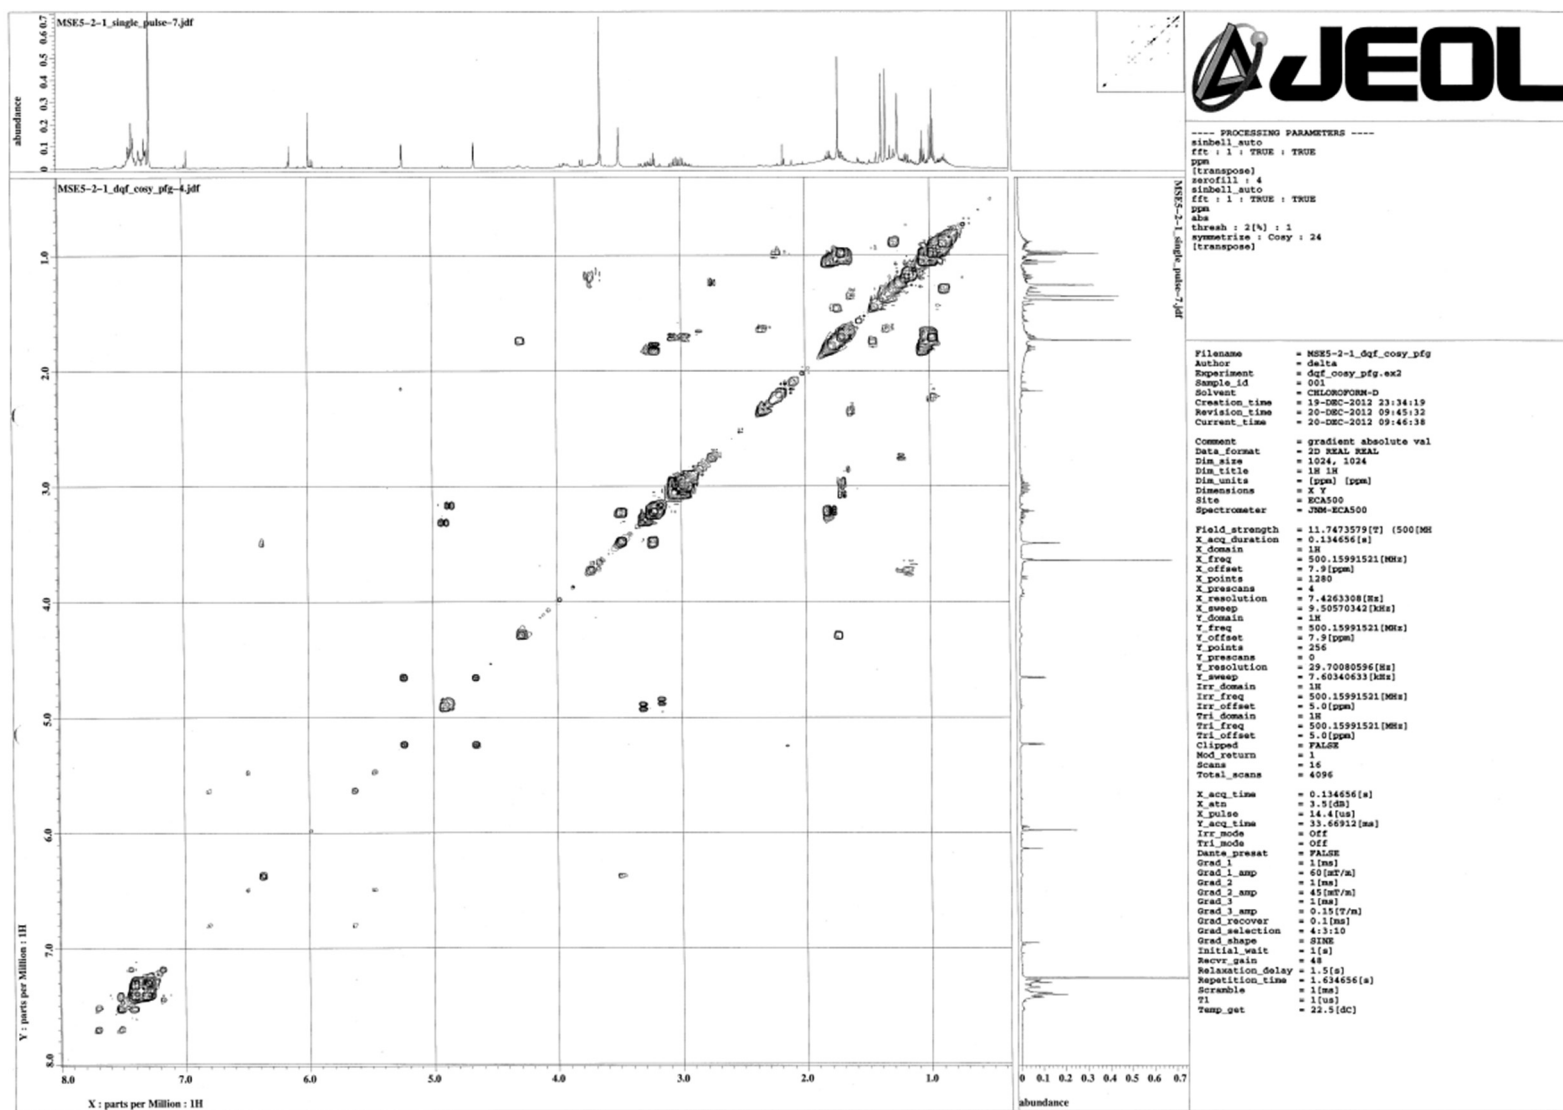Figure S13.  $^1\text{H}$ - $^1\text{H}$  COSY spectrum of mammeasin M (3)

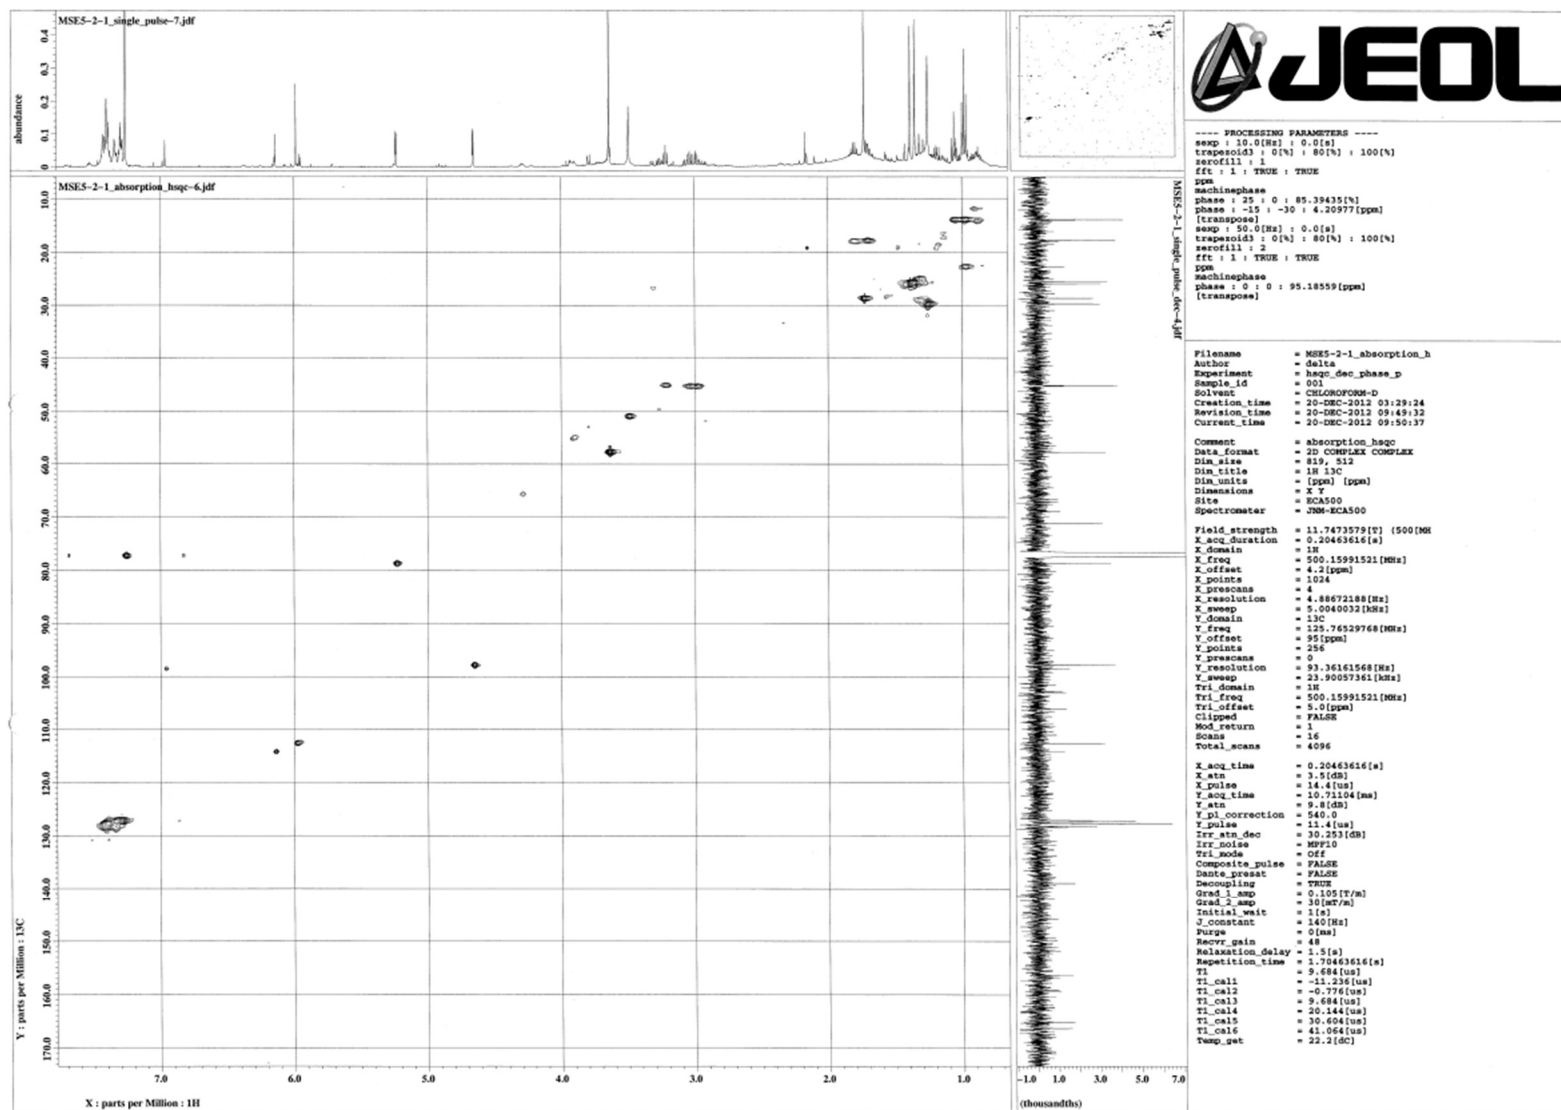

Figure S14. HSQC spectrum of mammeasin M (3)

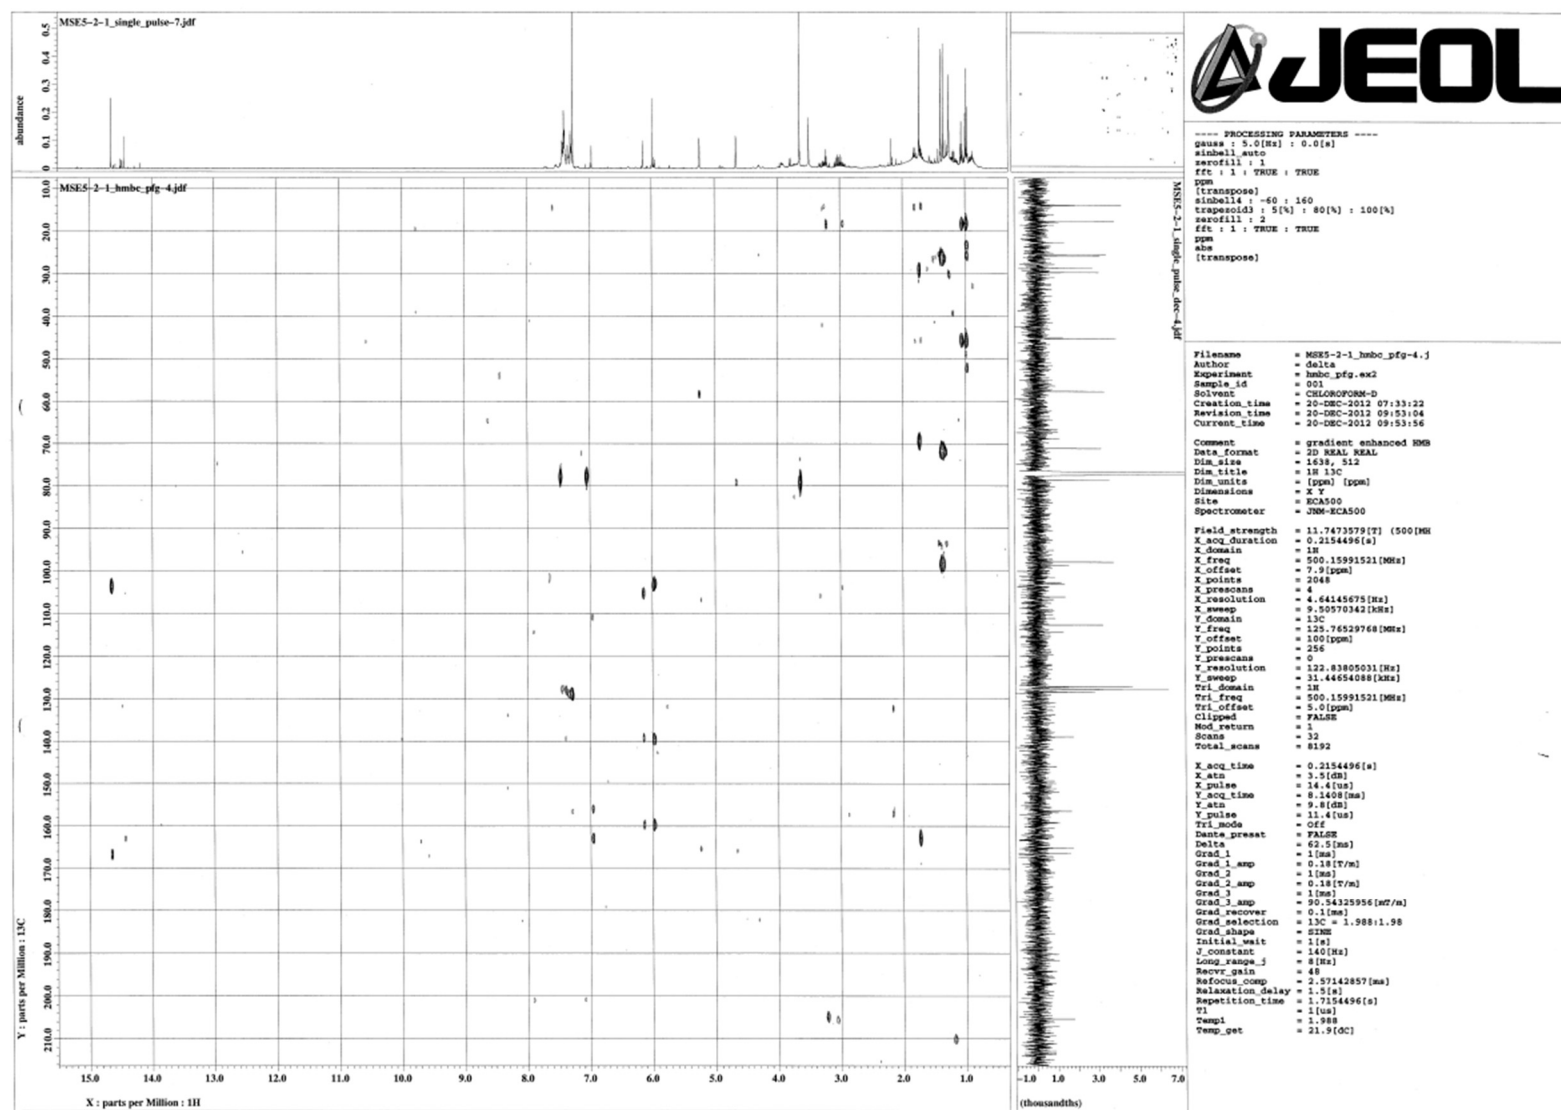

Figure S15. HMBC spectrum of mammeasin M (3)

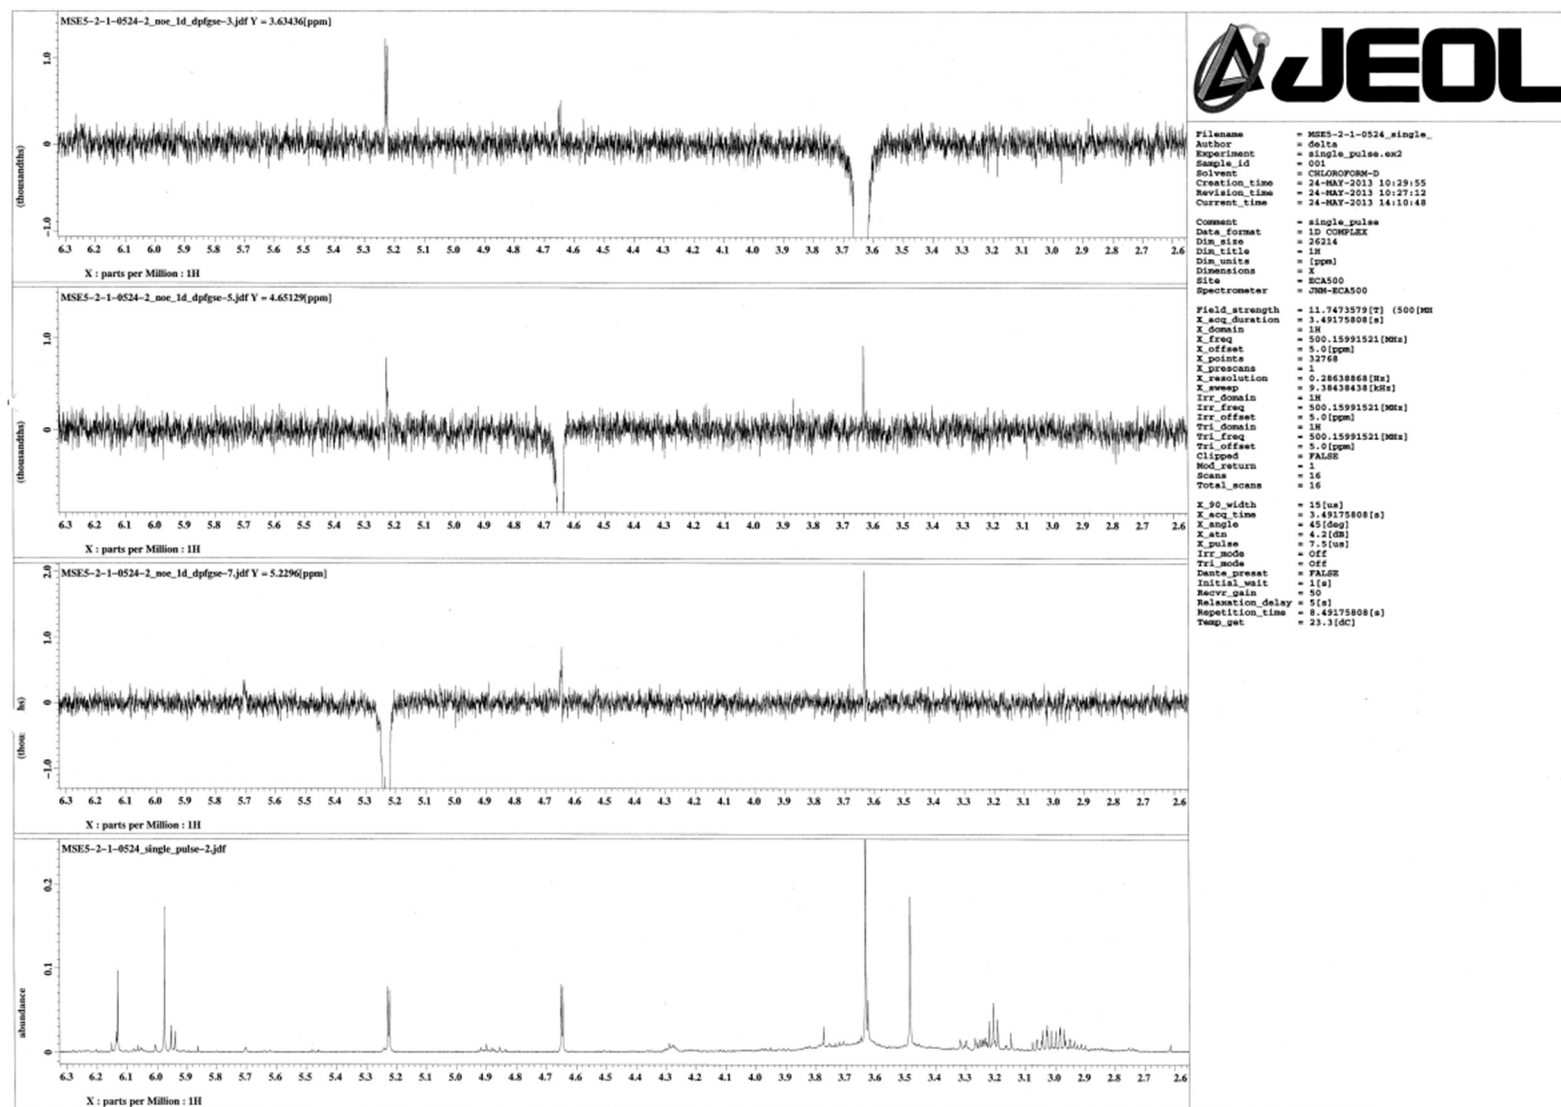

Figure S16. Difference NOE spectrum of mammeasin M (3)

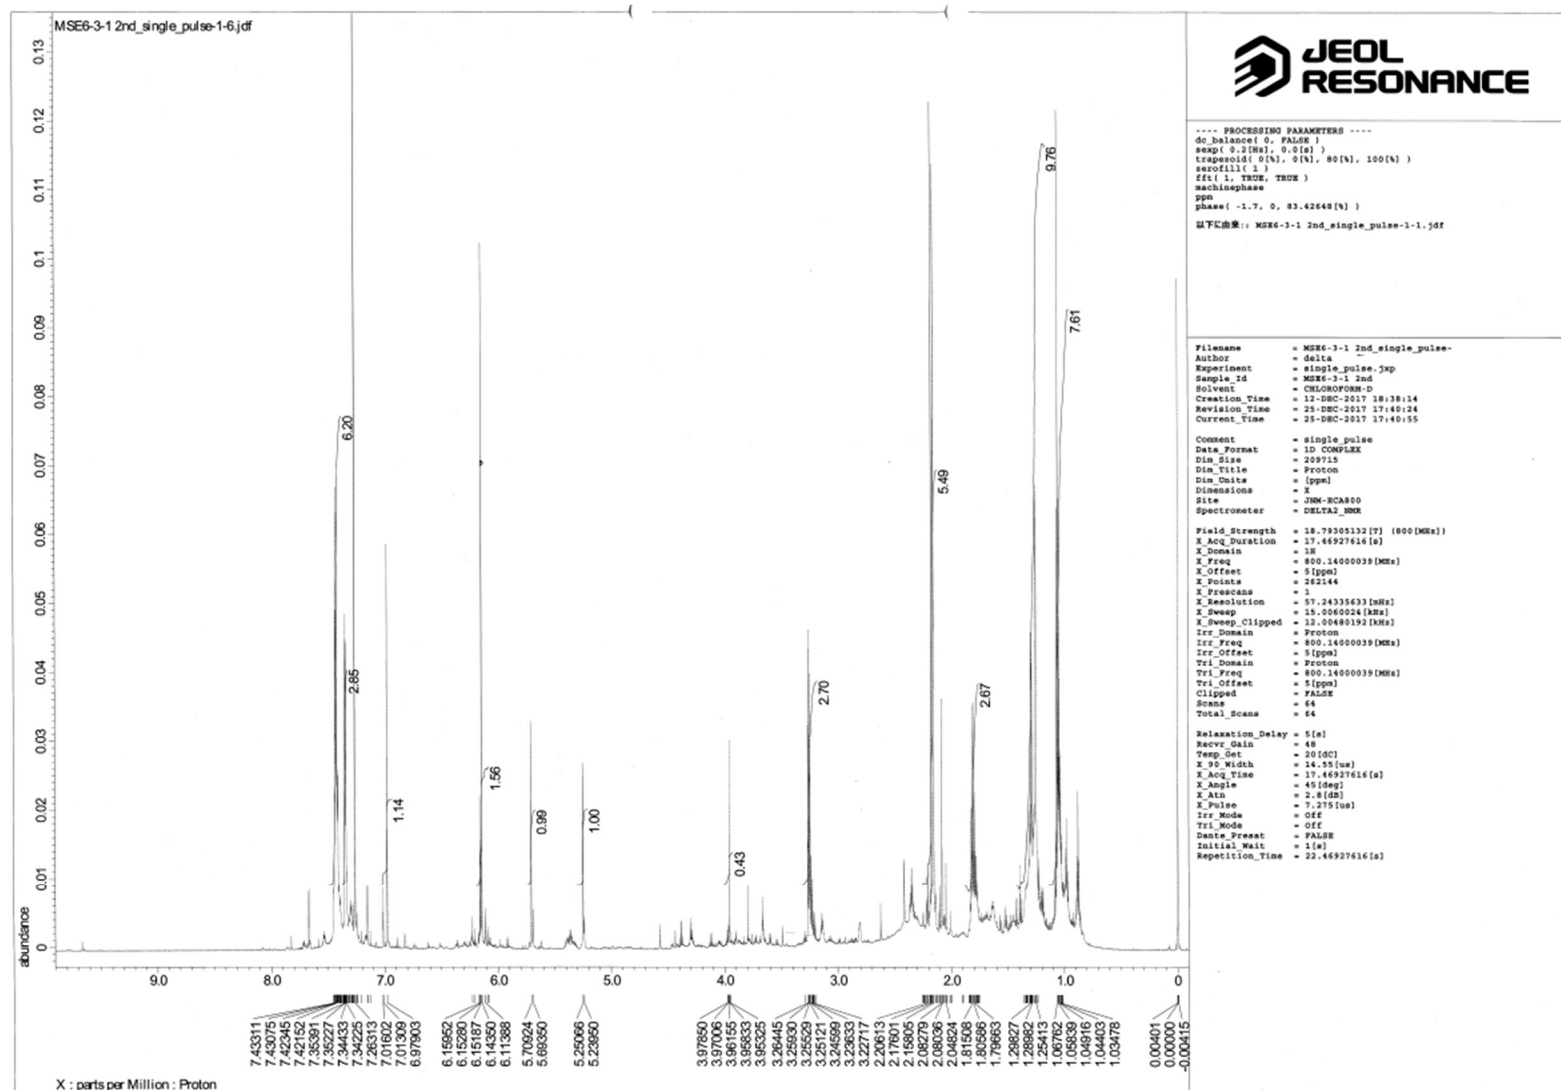Figure S17.  $^1\text{H}$ -NMR (800 MHz,  $\text{CDCl}_3$ ) spectrum of mammeasin N (4)



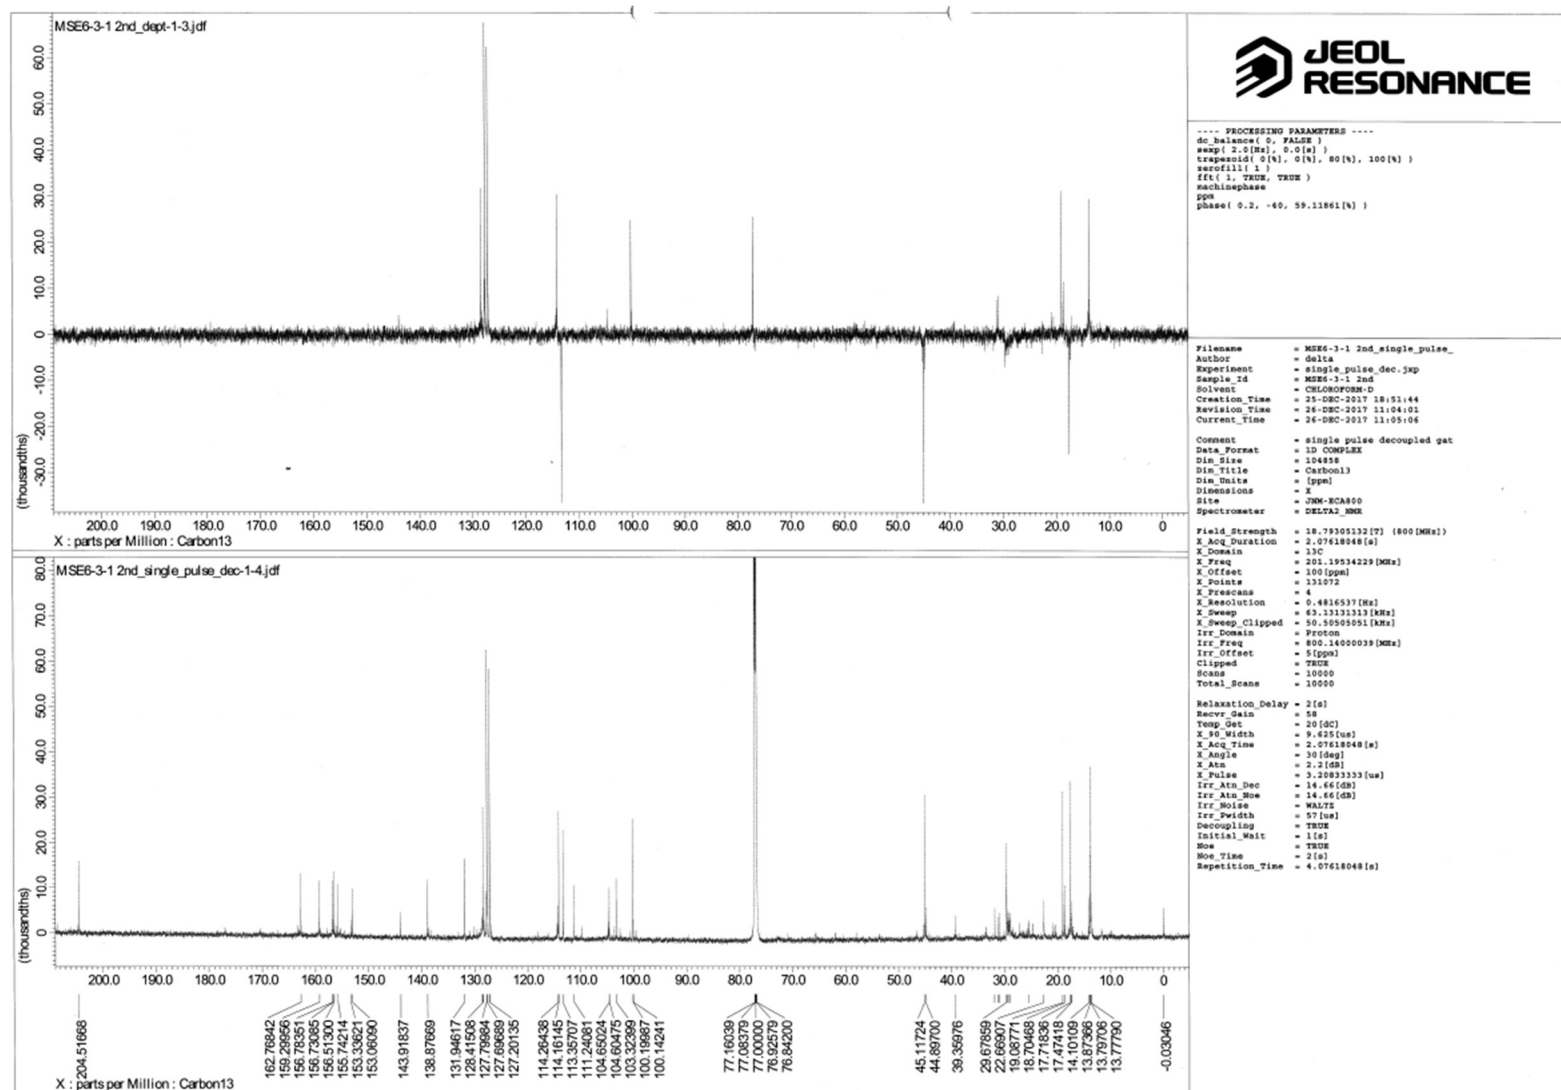Figure S18.  $^{13}\text{C}$ -NMR (200 MHz,  $\text{CDCl}_3$ ) spectrum of mammeasin N (4)

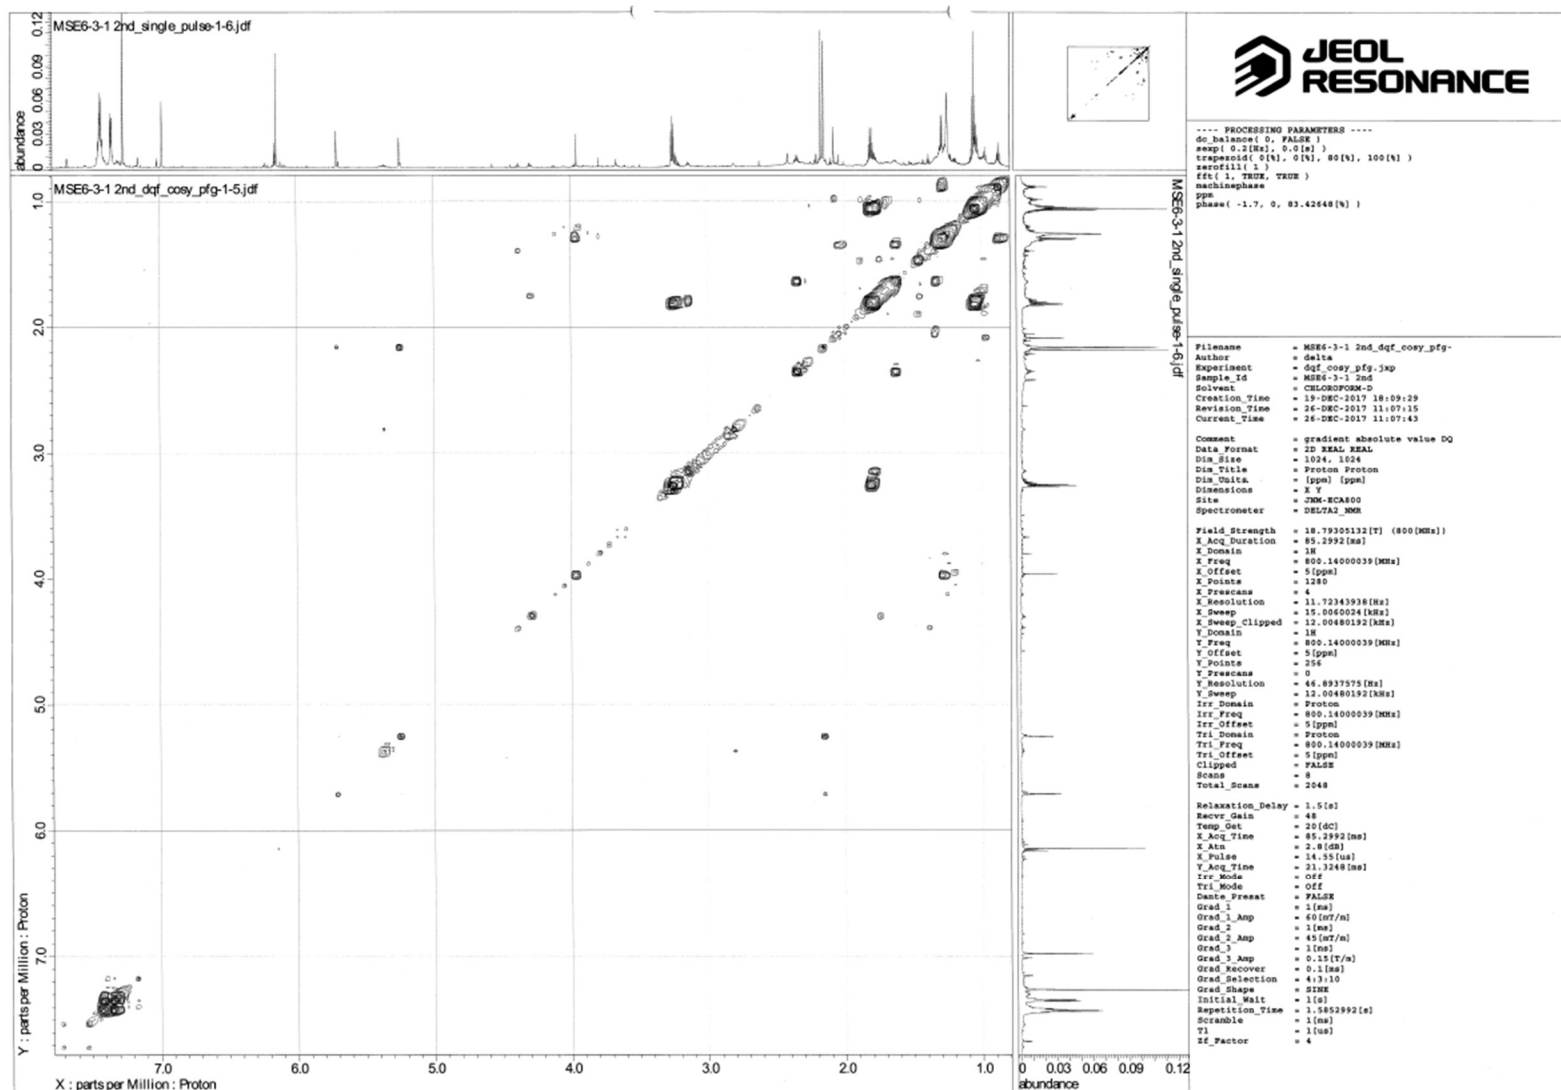Figure S19.  $^1\text{H}$ - $^1\text{H}$  COSY spectrum of mammeasin N (4)



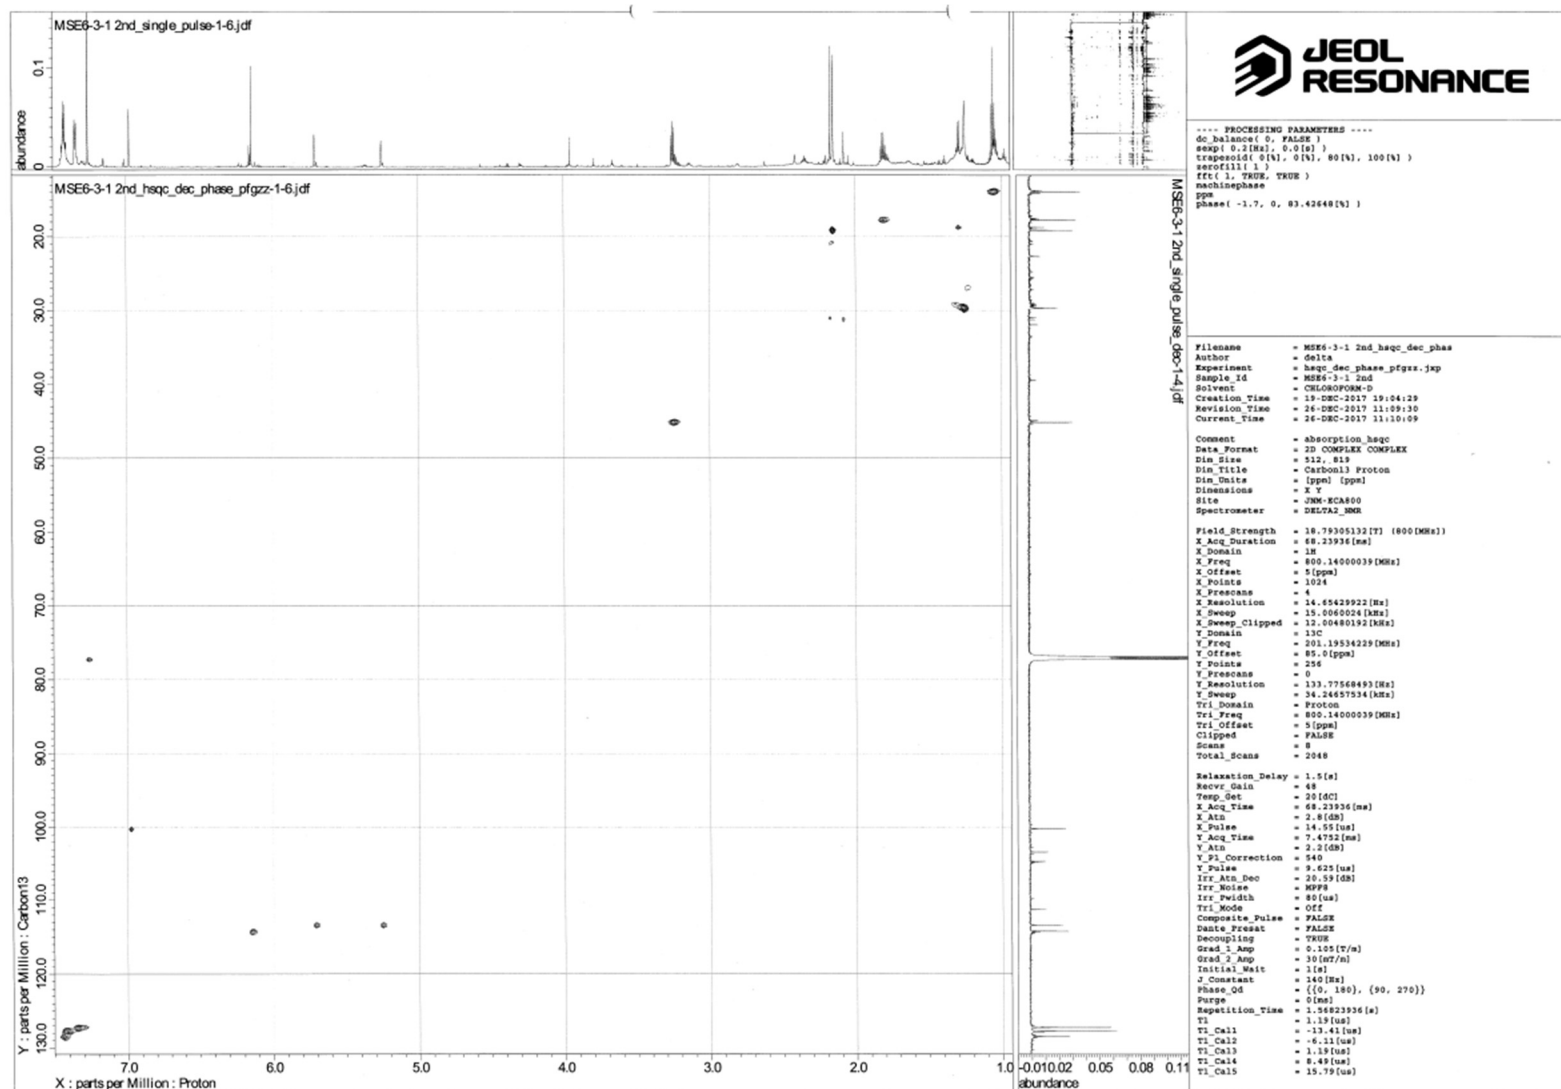

Figure S20. HSQC spectrum of mammeasin N (4)

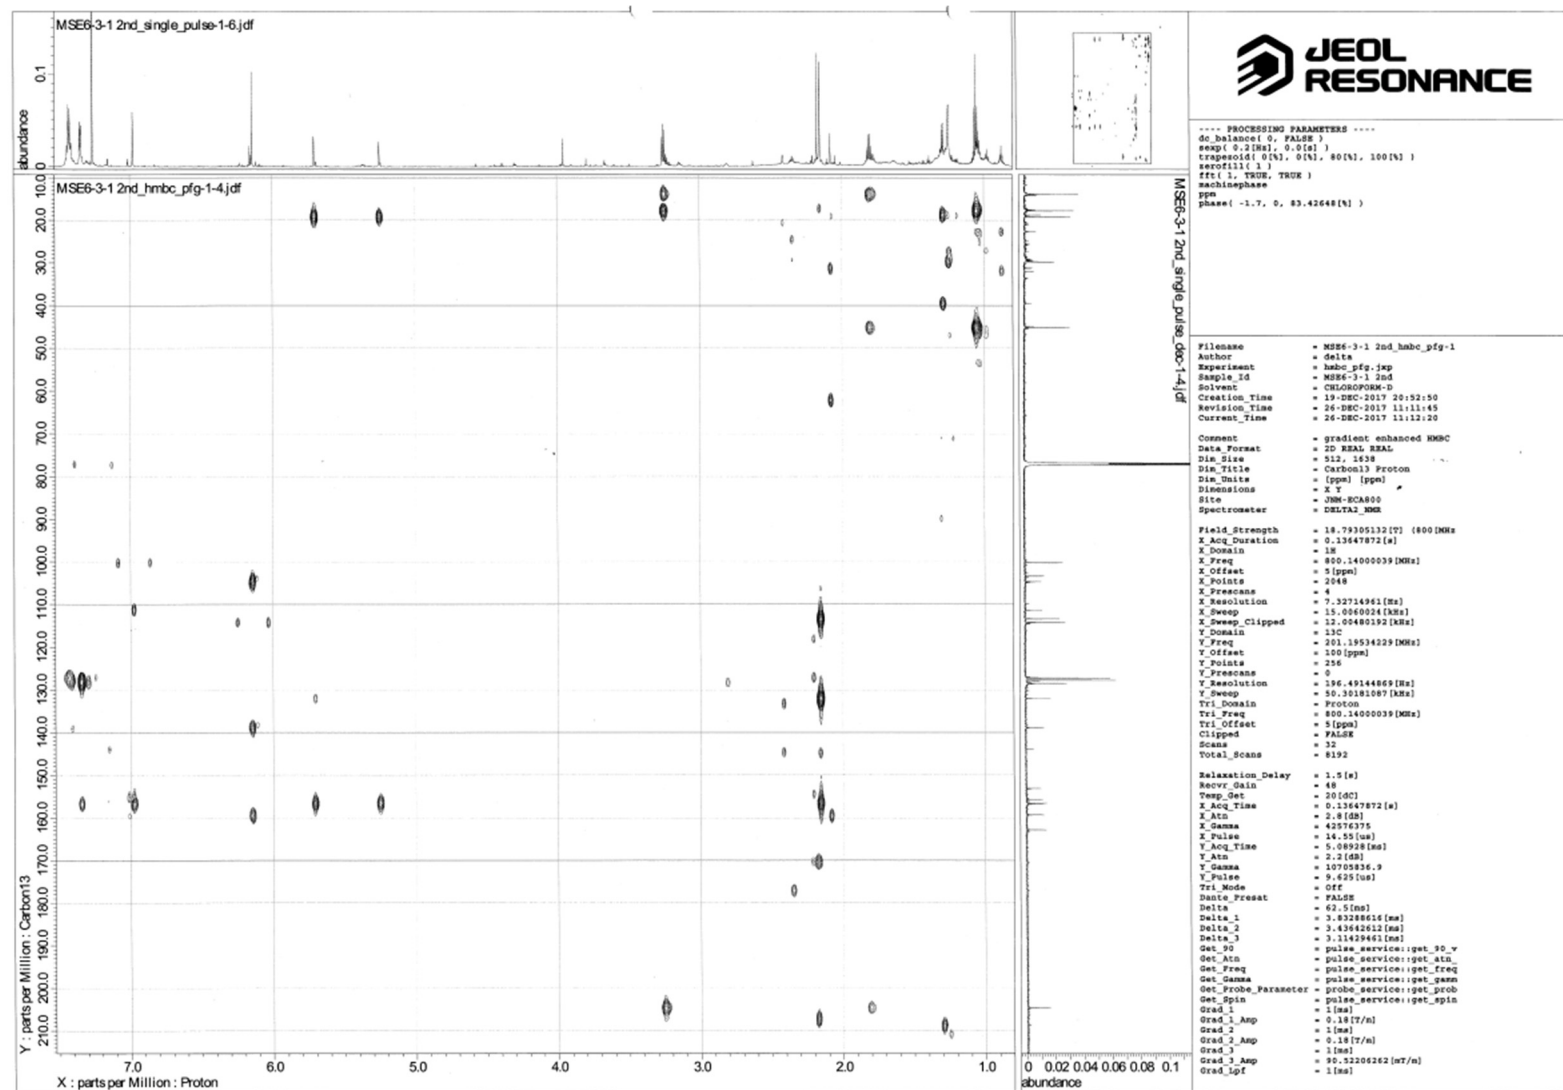

Figure S21. HMBC spectrum of mammeasin N (4)

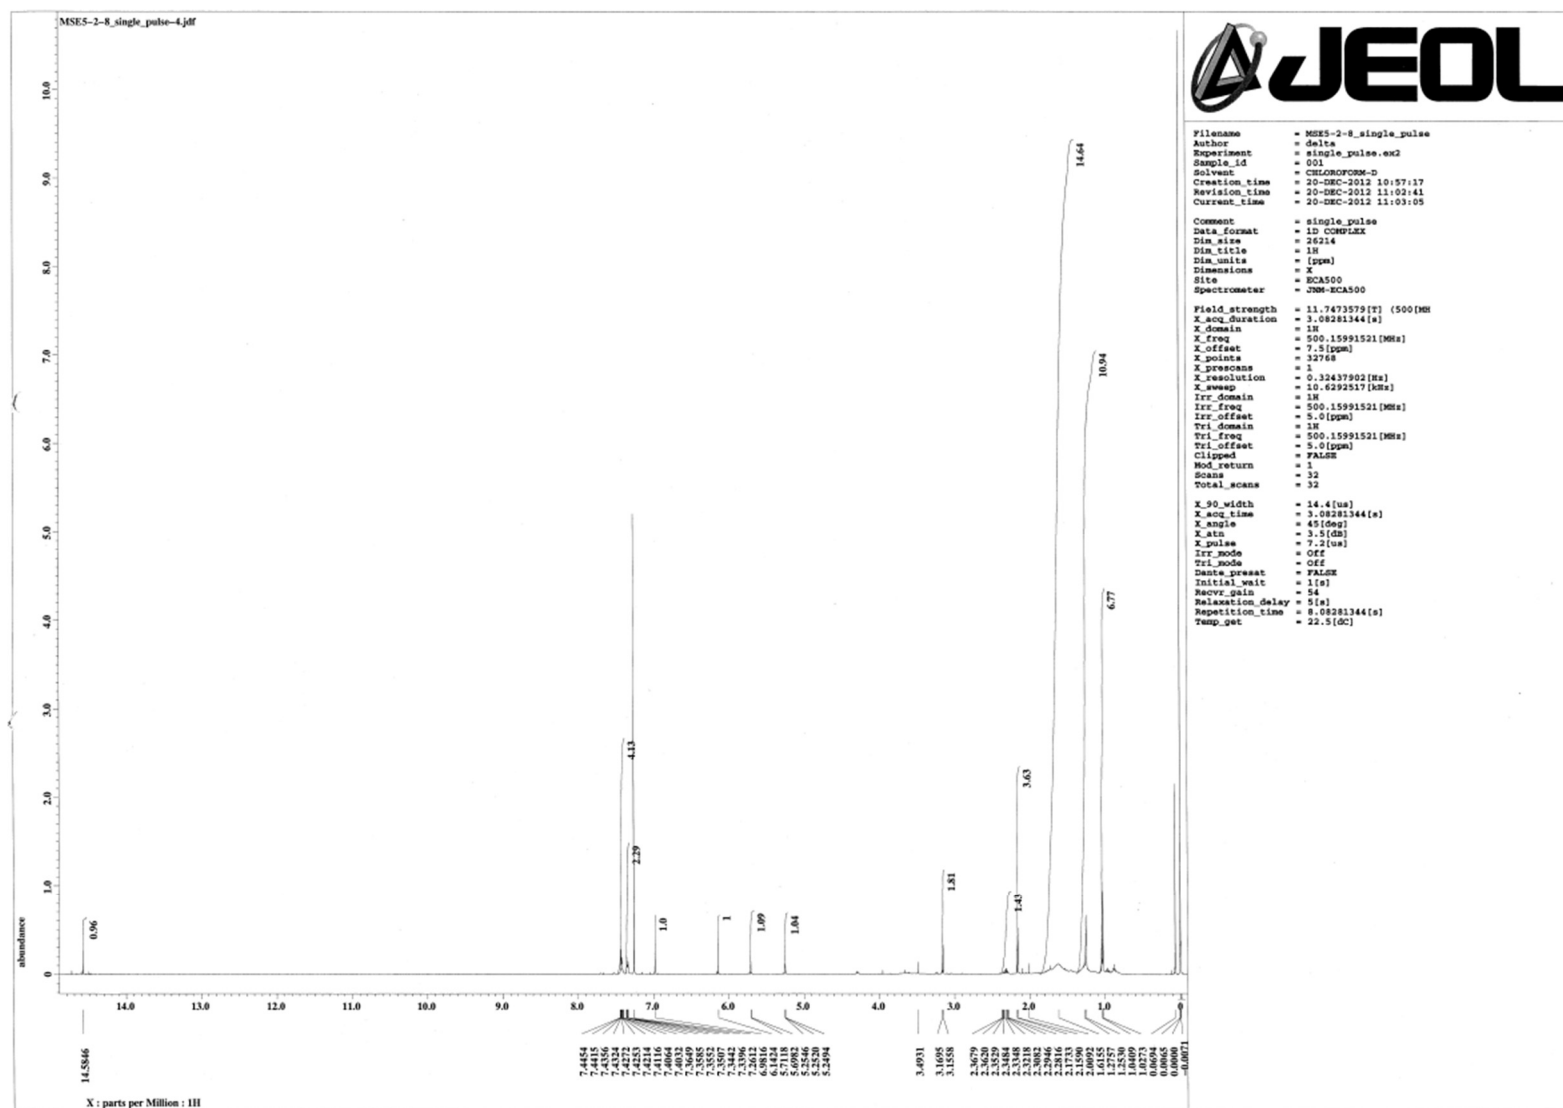Figure S22. <sup>1</sup>H-NMR (500 MHz, CDCl<sub>3</sub>) spectrum of mammeasin O (5)

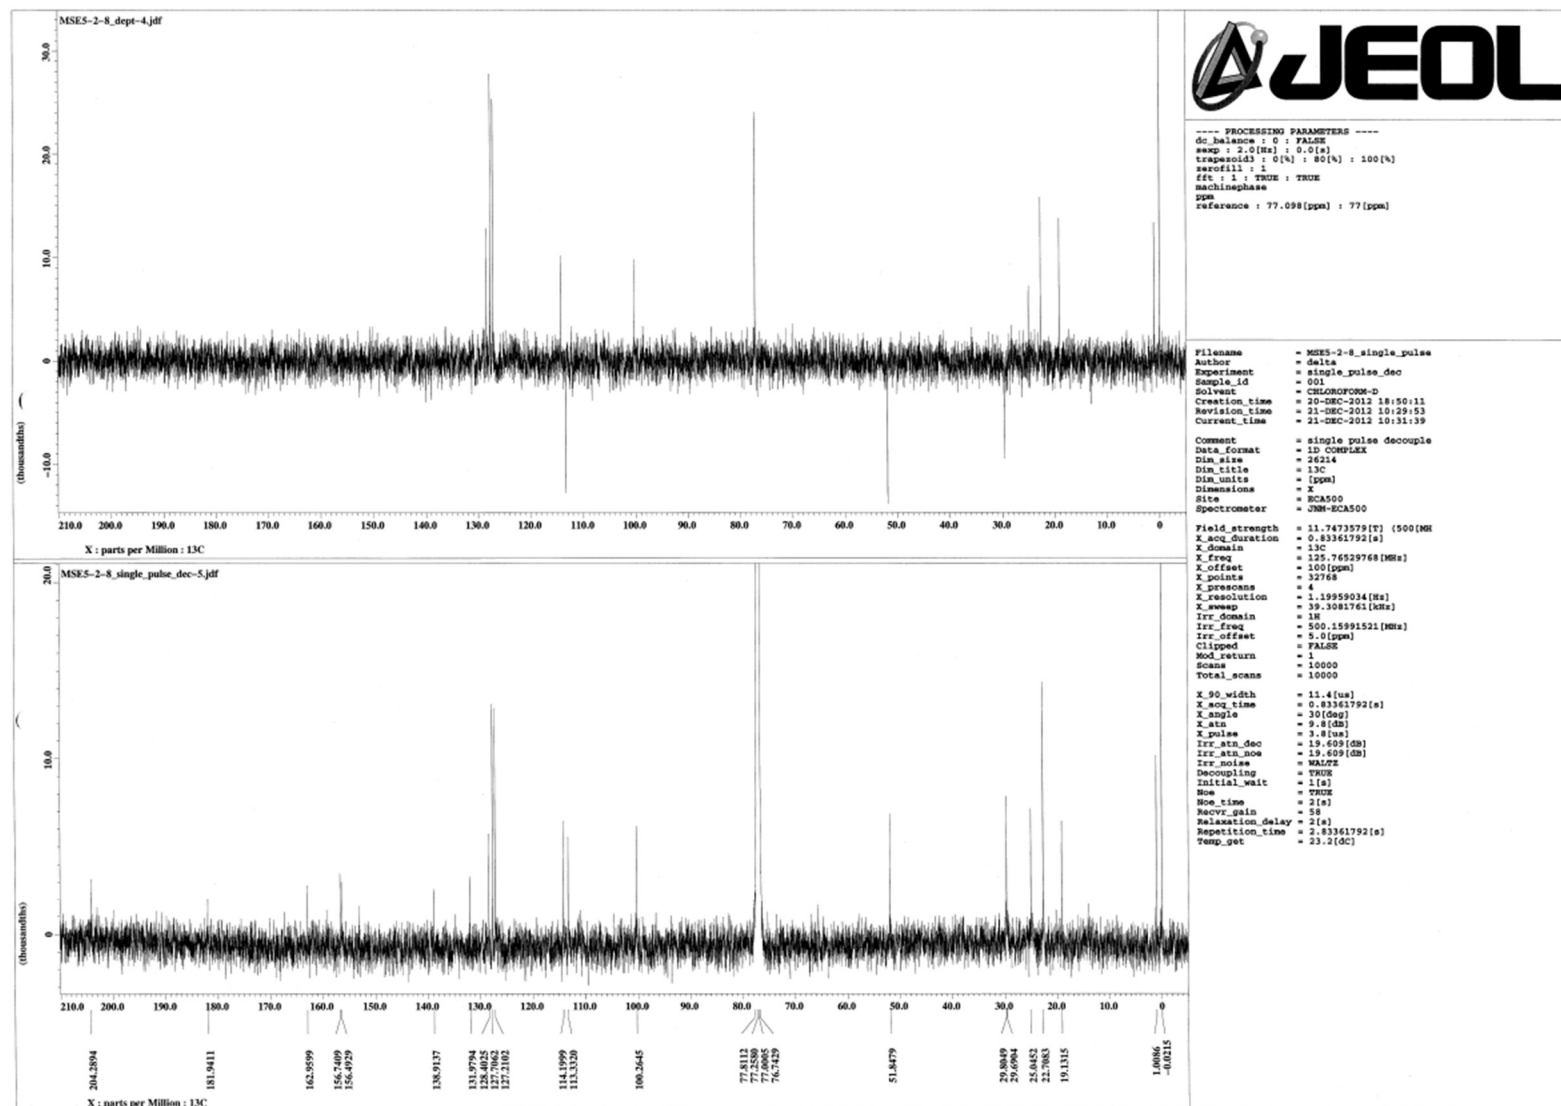Figure S23.  $^{13}\text{C}$ -NMR (125 MHz,  $\text{CDCl}_3$ ) spectrum of mammeasin O (5)

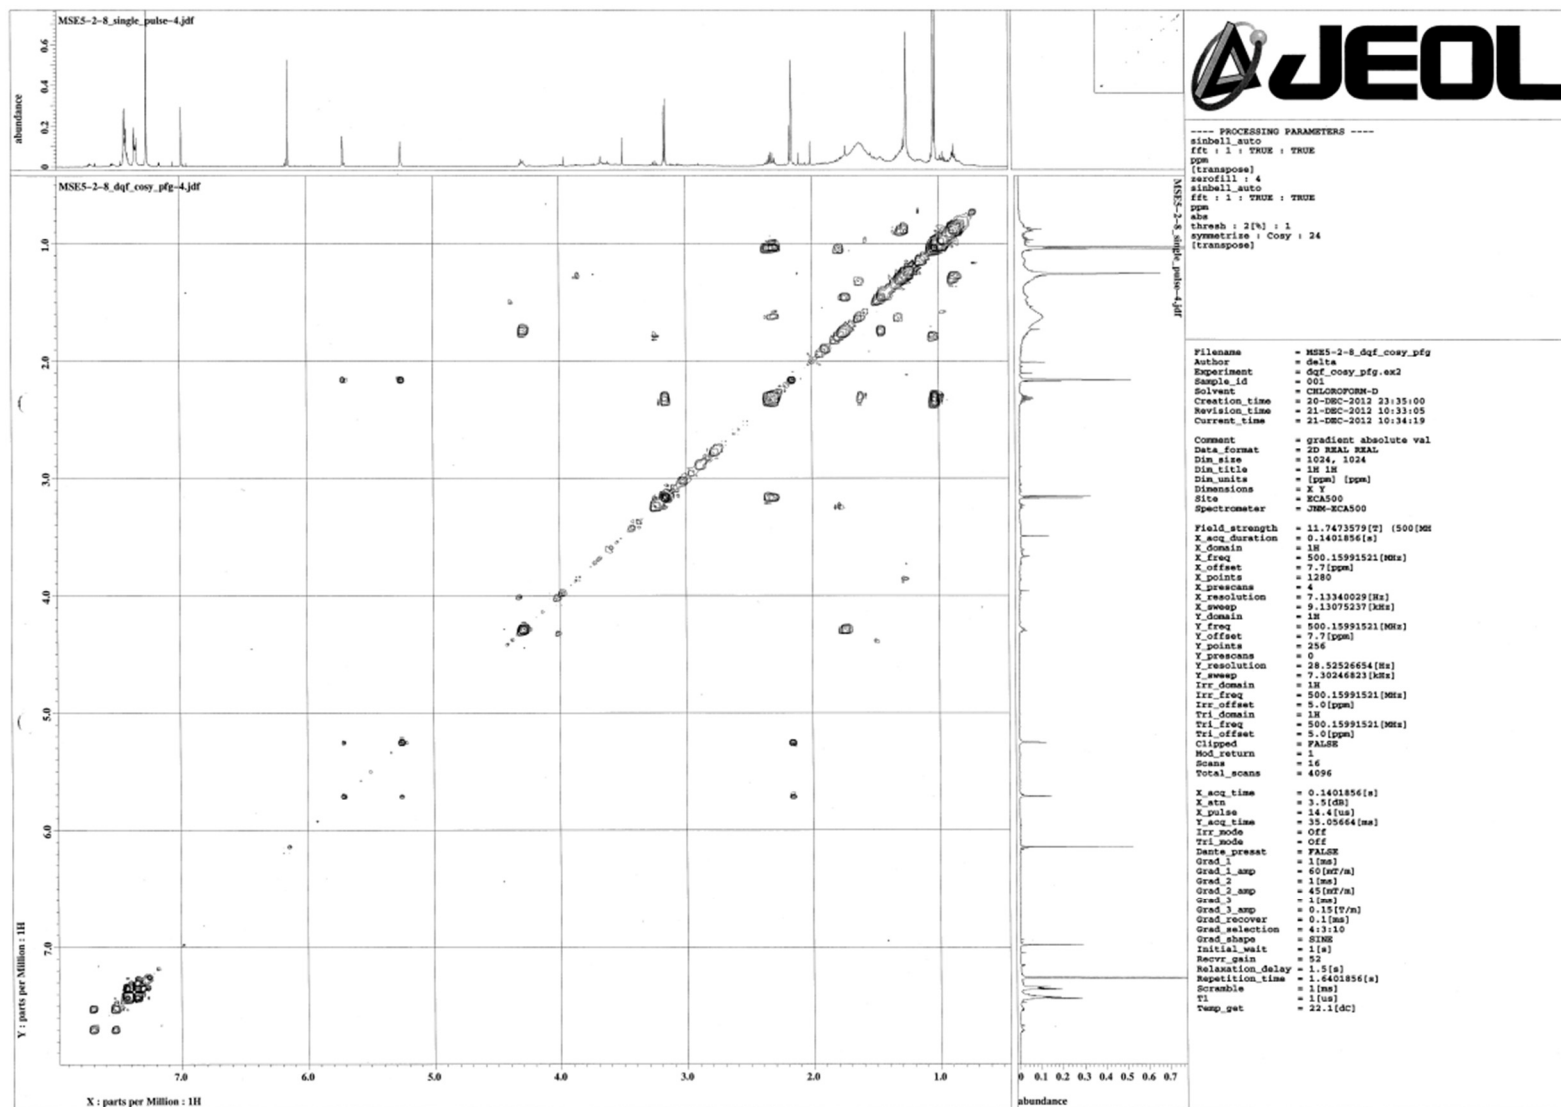Figure S24.  $^1\text{H}$ - $^1\text{H}$  COSY spectrum of mammeasin O (5)

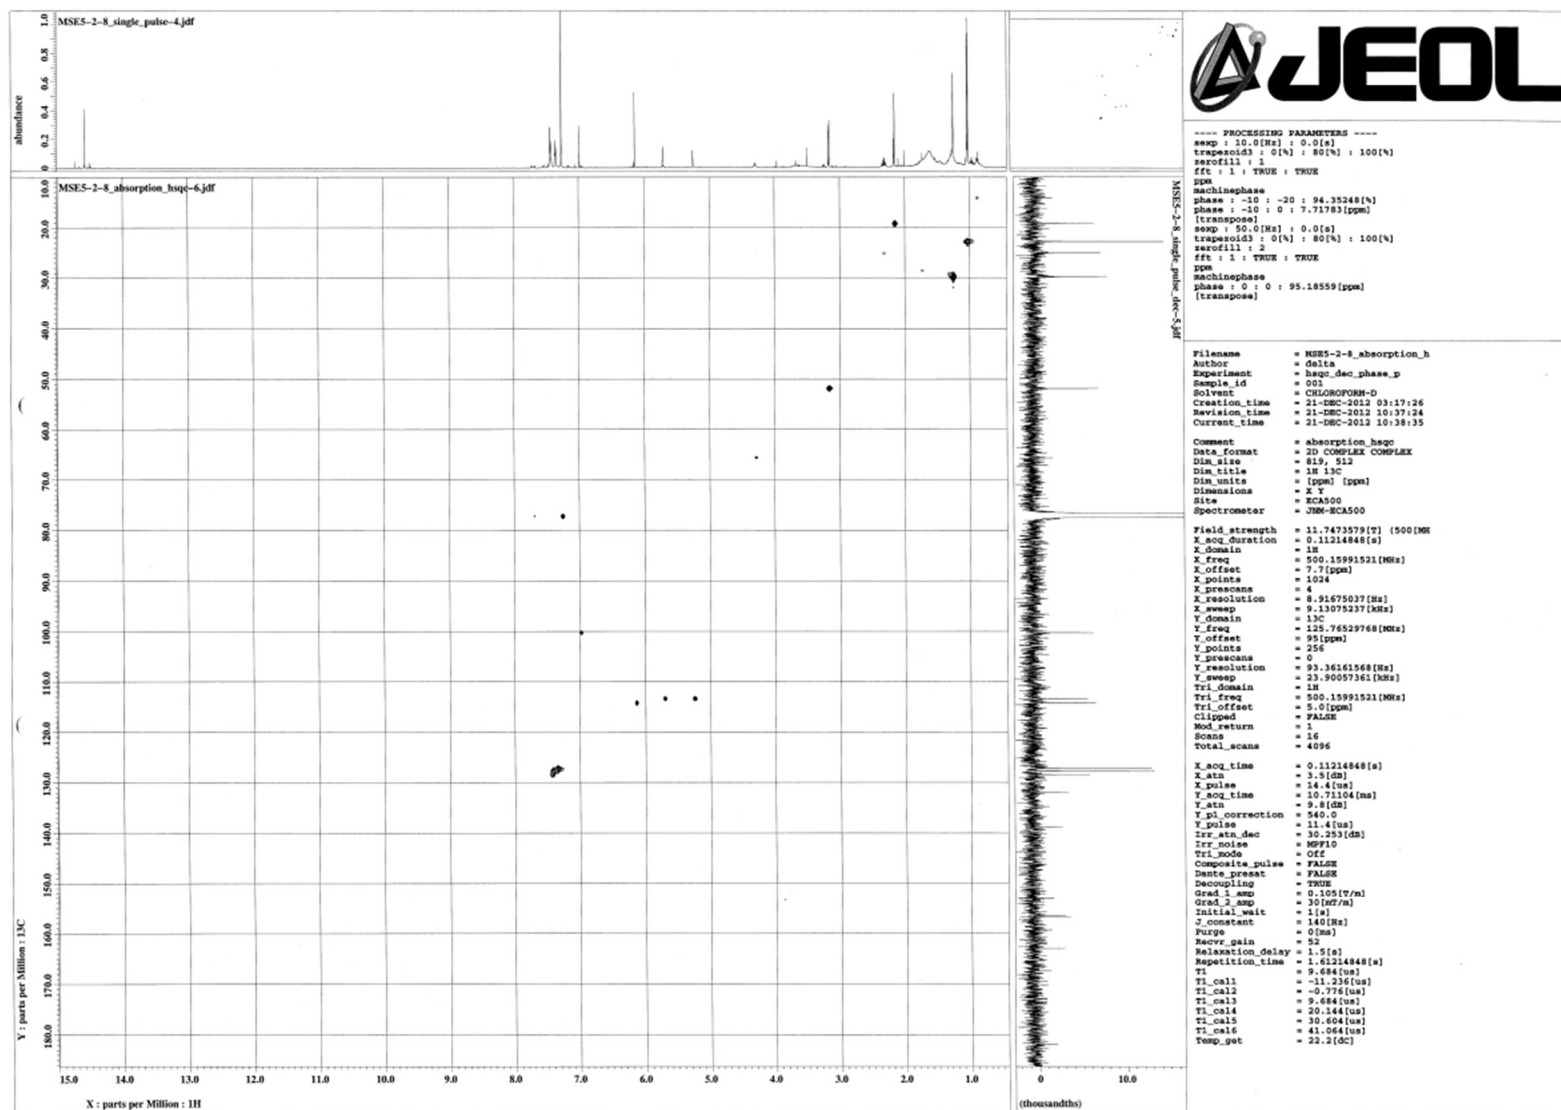

Figure S25. HSQC spectrum of mammeasin O (5)

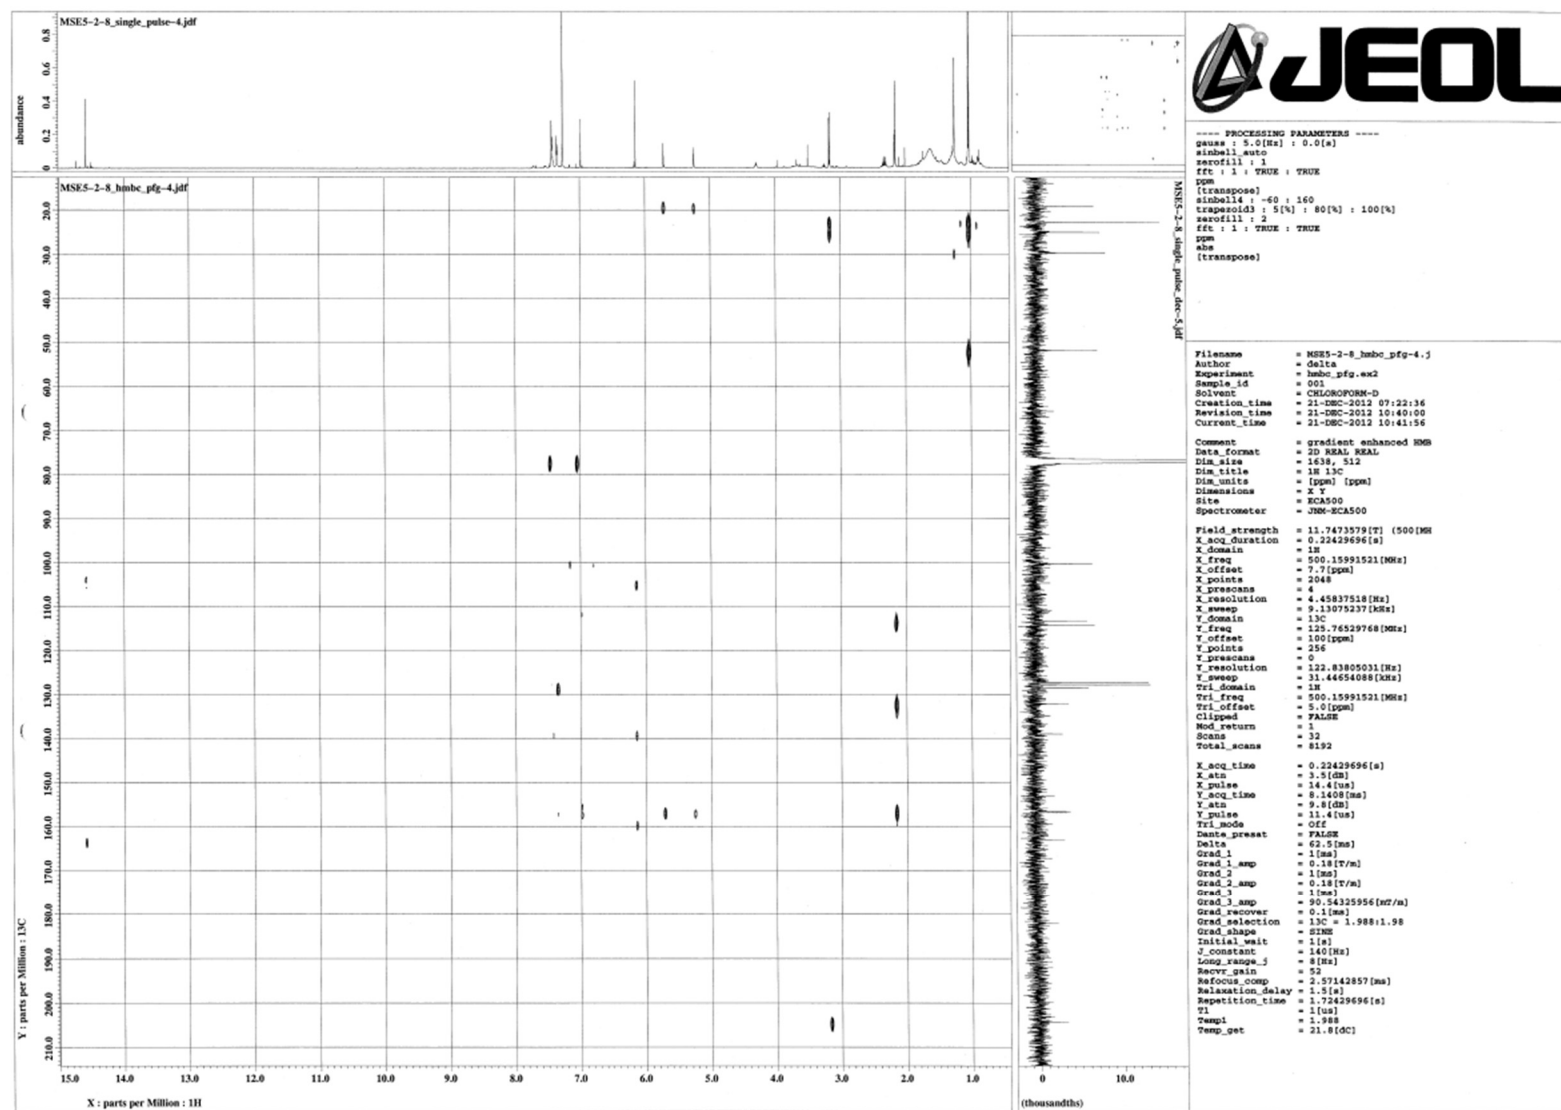

Figure S26. HMBC spectrum of mammeasin O (5)



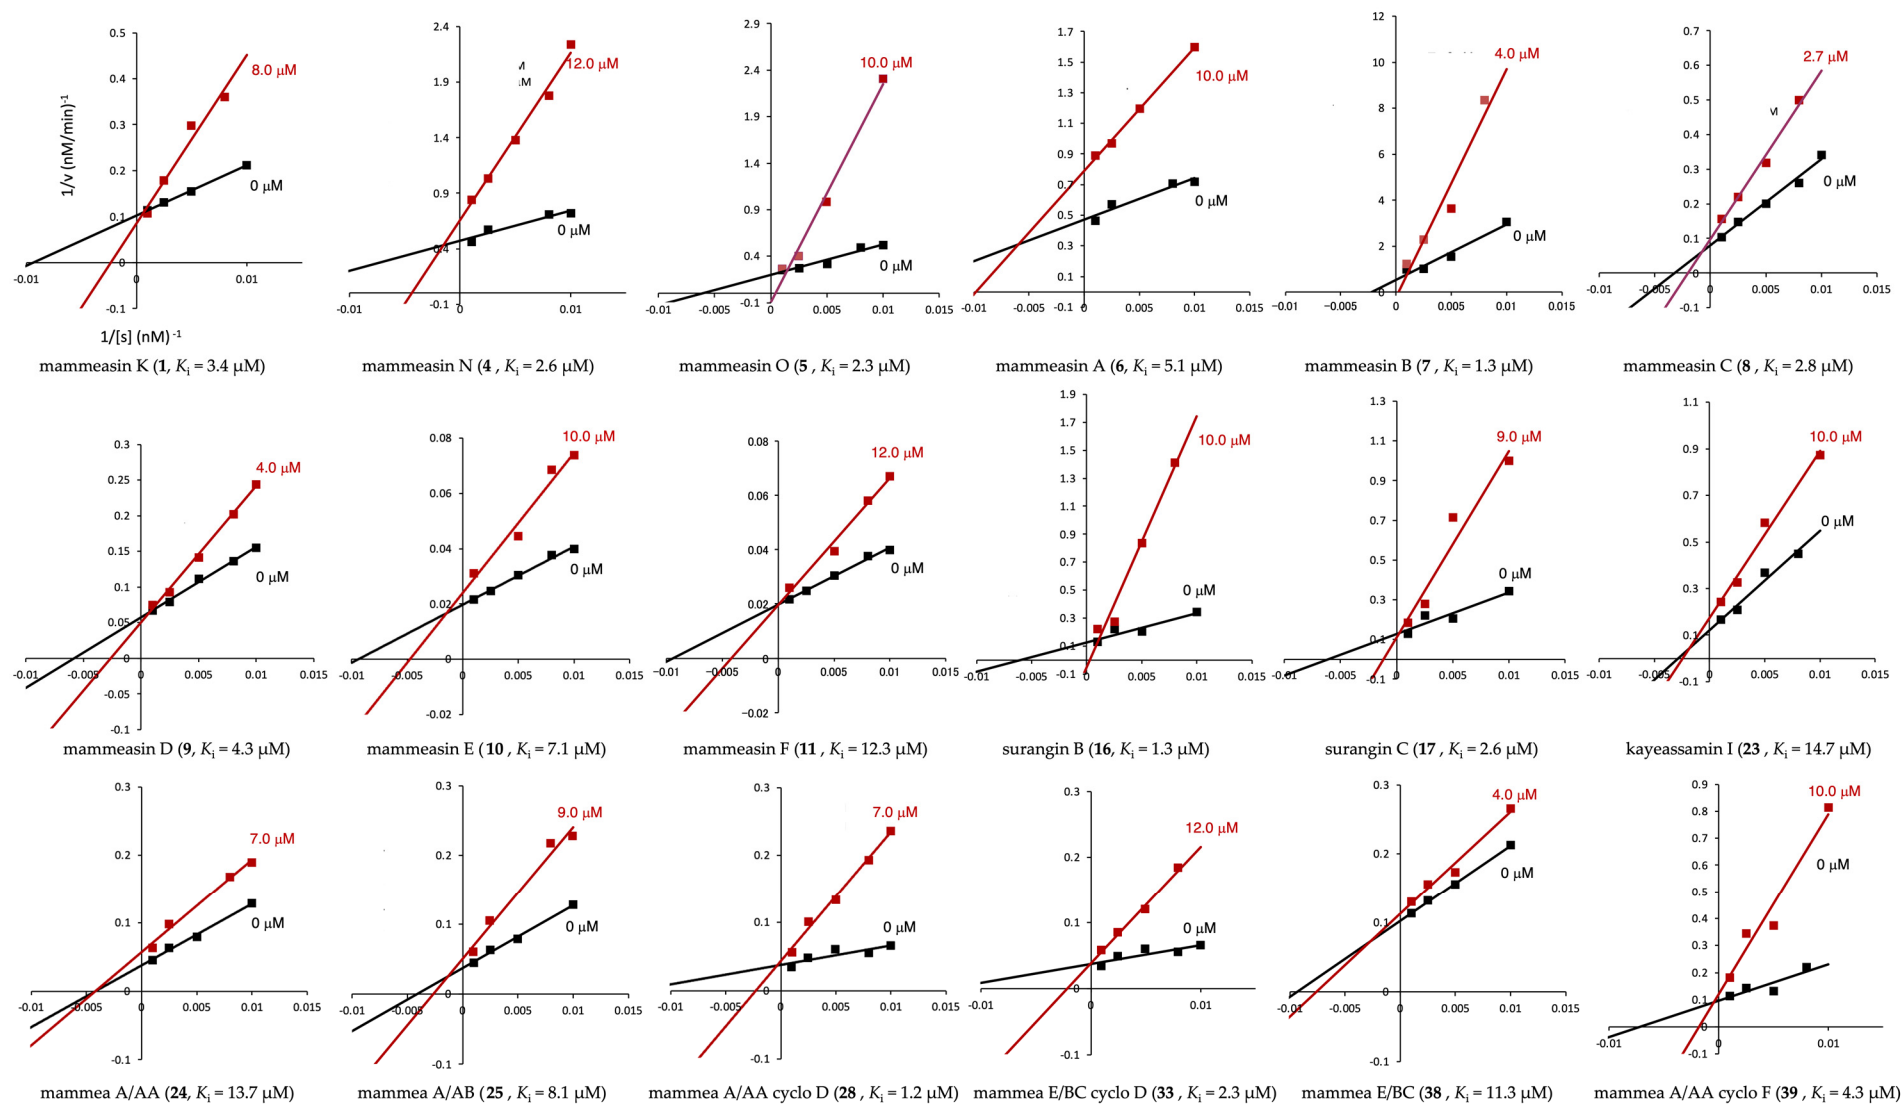

**Figure S27.** Lineweaver-Burk plots of the inhibition of human recombinant aromatase activity by 1, 4–11, 16, 17, 23–25, 28, 33, 38, and 39
